# Supplementary material for: Approaches to the Functionalization of Organosilicon Dendrones Based on Limonene
Source: MDPI journal article supplement (doi:10.3390/app13042121), 2023-02-07
Supplement: s1 [file s1]

## SUPPORTING INFORMATION

### **Approaches to the functionalization of carbosilane and carbosilane-siloxane dendrons based on limonene**

Aleksei I. Ryzhkov, Fedor V. Drozdov, Georgij V. Cherkaev, Aziz M. Muzafarov

#### CONTENT

SI1. NMR spectra

SI2. GPC curves

SI3. GC curves

## SI1. NMR spectra

PDA118.001.1.1.1r  
1H\_

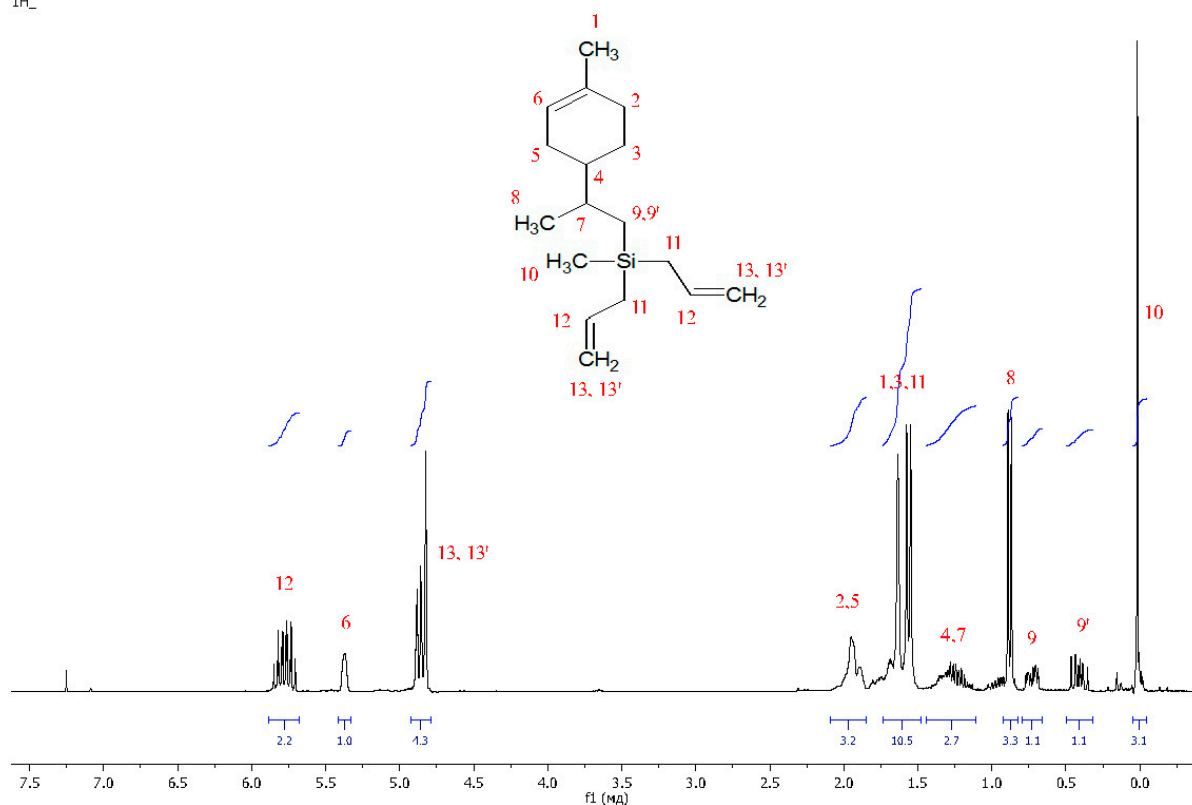

Figure S1.  $^1\text{H}$  NMR spectrum of *Lim-GoAll*<sup>2</sup>.

pda127.001.fid

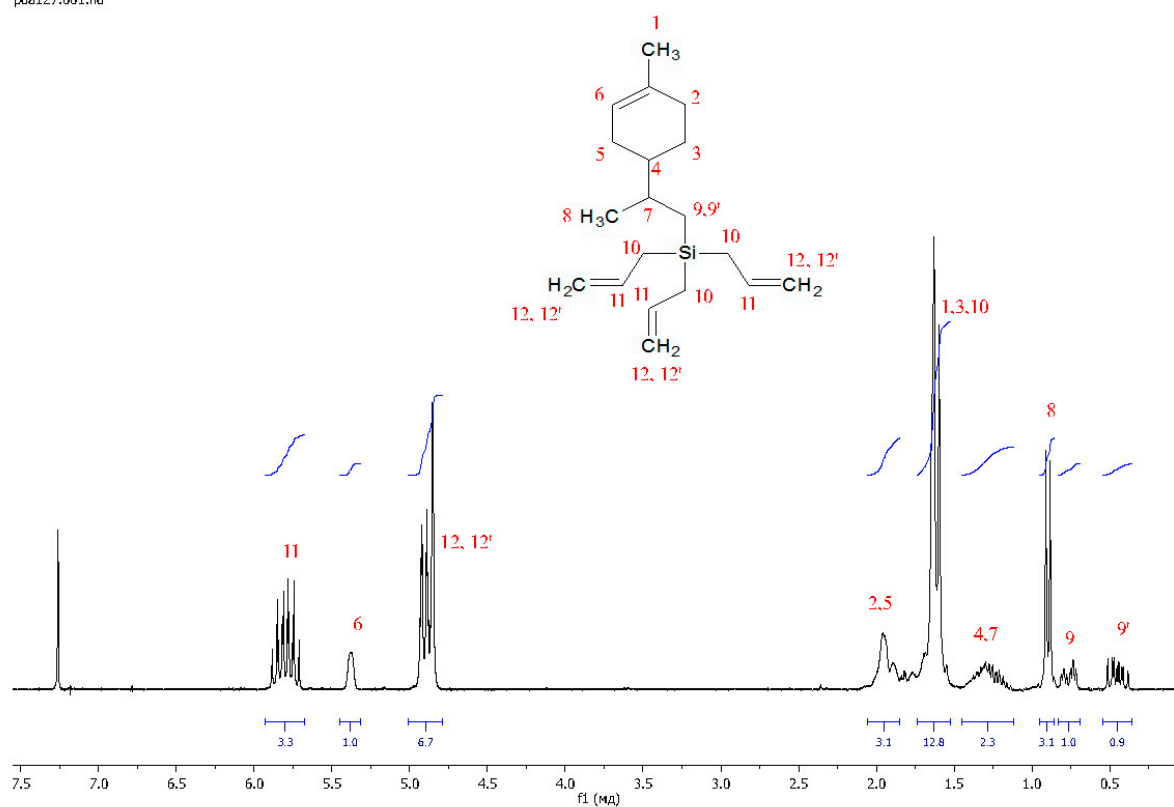

Figure S2.  $^1\text{H}$  NMR spectrum of *Lim-GoAll*<sup>3</sup>.

ar88.005~1.1.1r  
1H\_

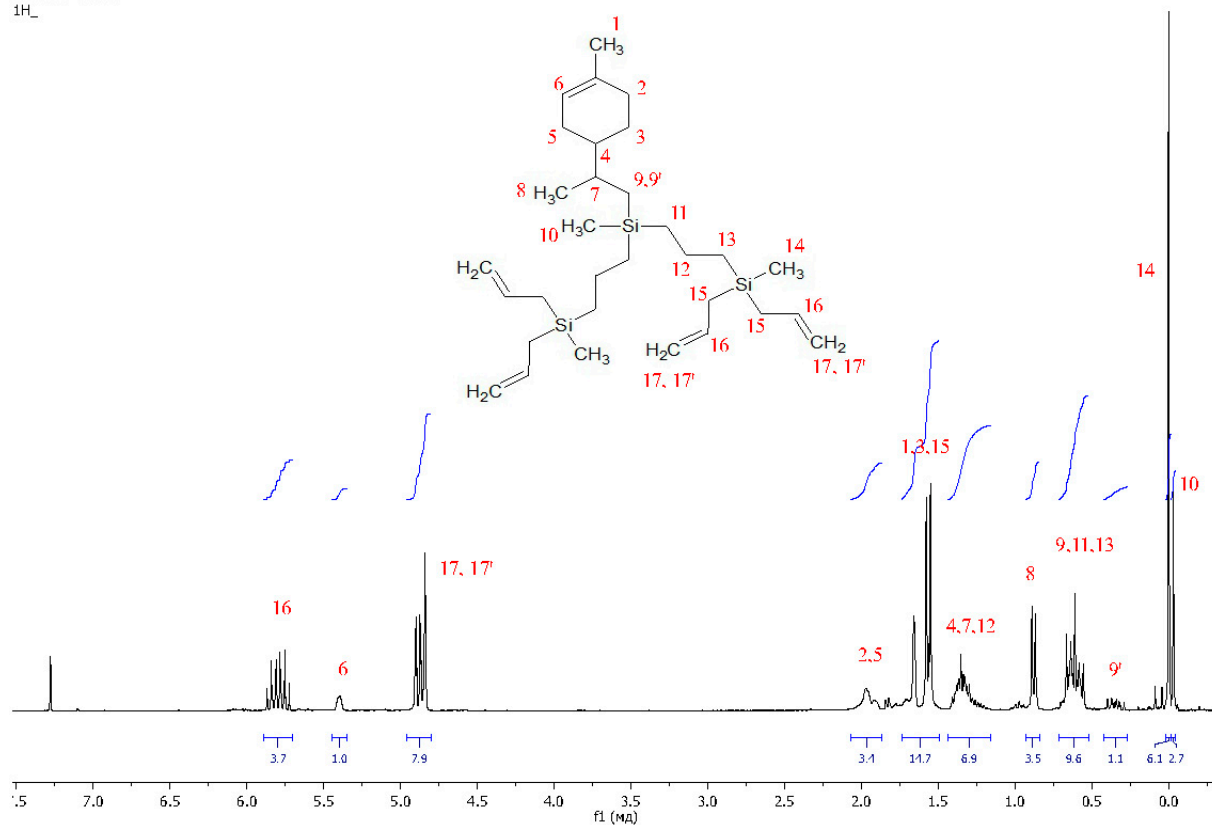

Figure S3. <sup>1</sup>H NMR spectrum of *Lim-G1All<sup>4</sup>*.

fd800.001

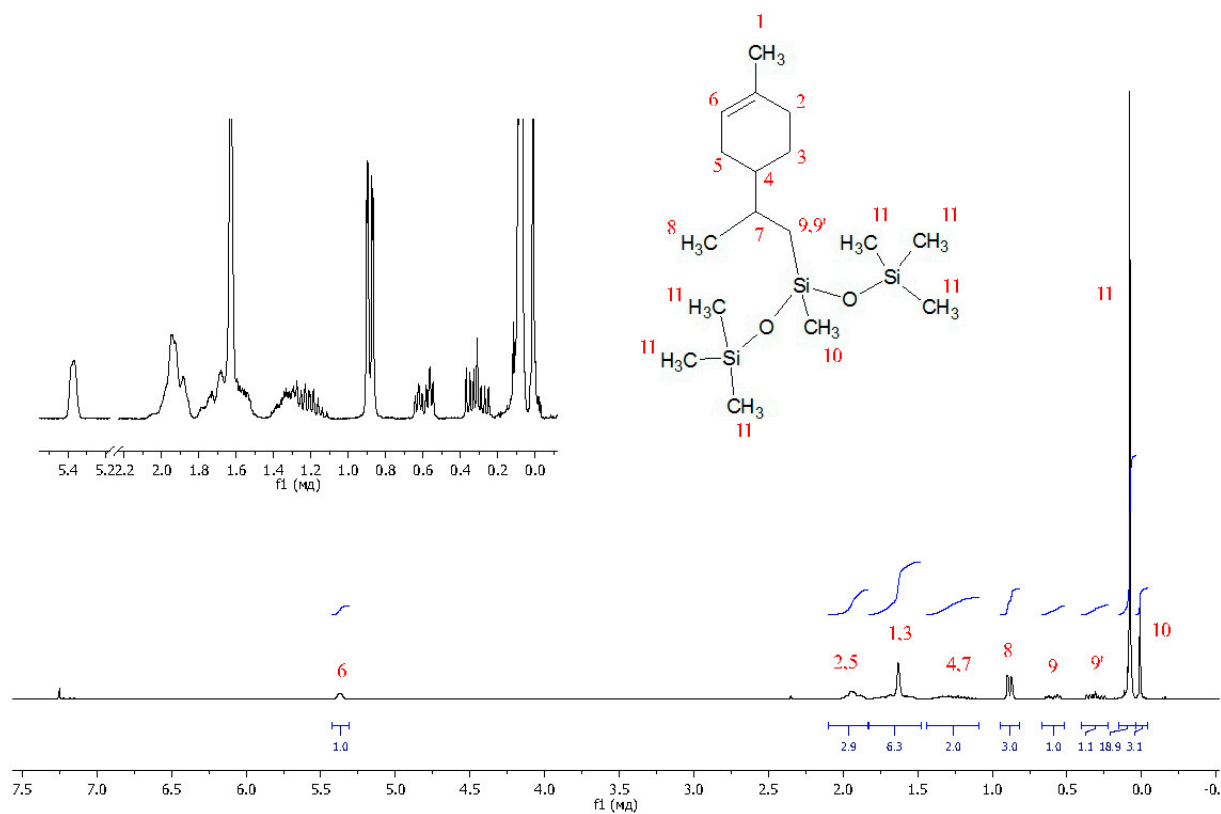

Figure S4. <sup>1</sup>H NMR spectrum of *Lim-G0.5TMS<sub>2</sub>*.

ar90.2.1.1.1r  
1H\_

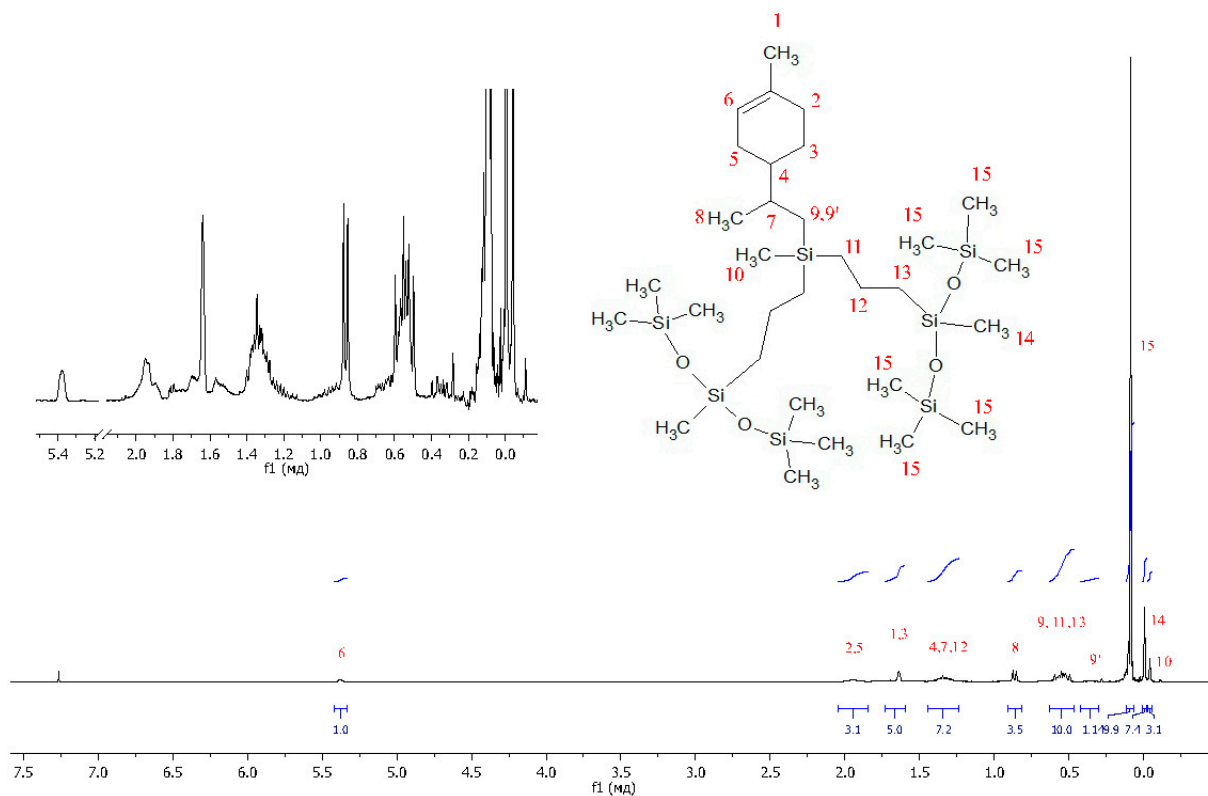

Figure S5.  $^1\text{H}$  NMR spectrum of *Lim-G<sub>1,5</sub>TMS<sup>4</sup>*.

ar91.2.1.1.1r  
1H\_

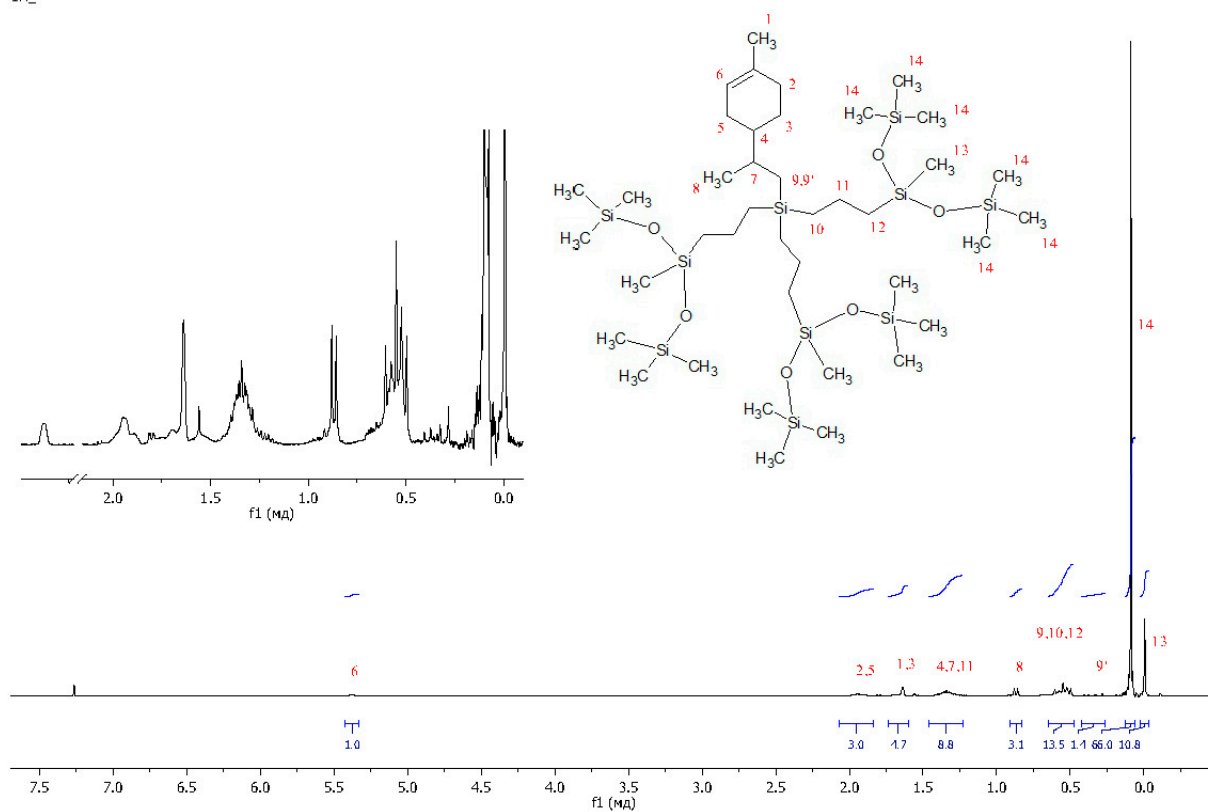

Figure S6.  $^1\text{H}$  NMR spectrum of *Lim-G<sub>1,5</sub>TMS<sup>6</sup>*.

ar92.2.1.1.1r  
1H\_

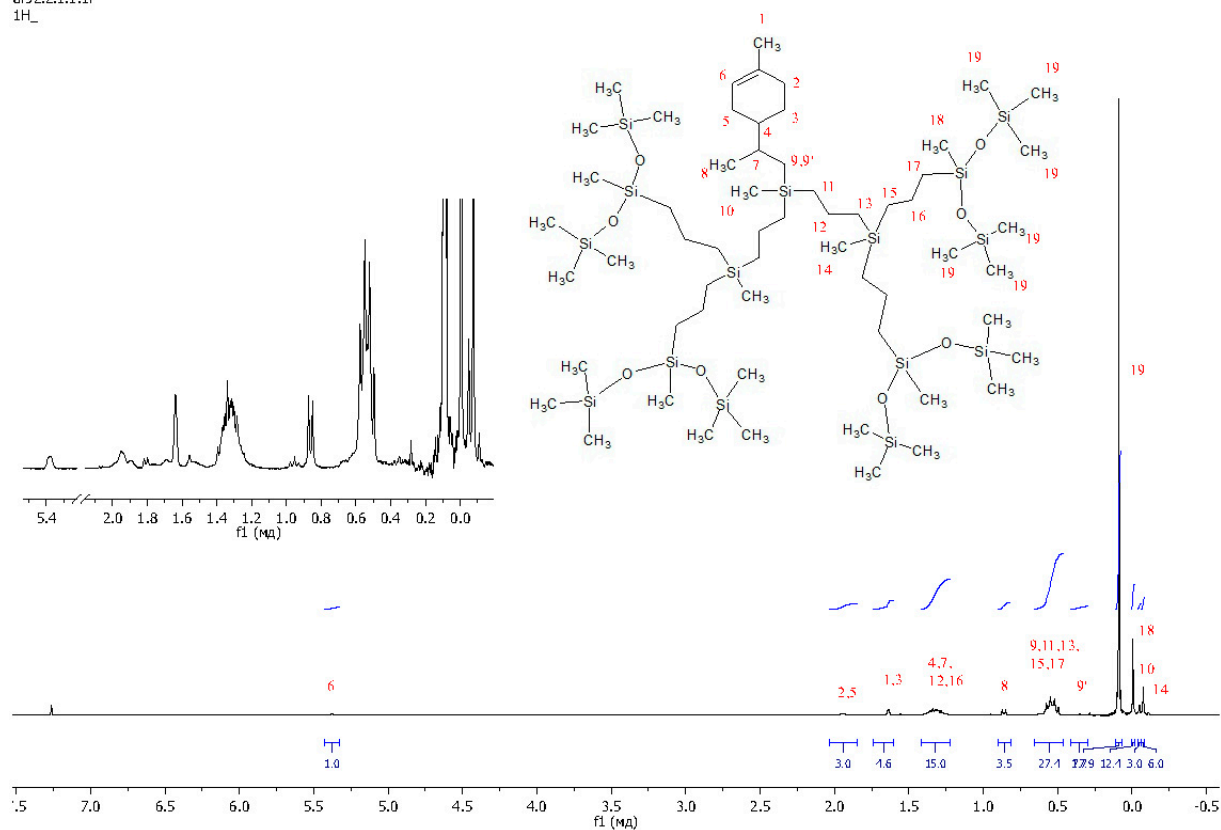

Figure S7. <sup>1</sup>H NMR spectrum of *Lim-G<sub>2.5</sub>TMS<sub>8</sub>*<sup>8</sup>.

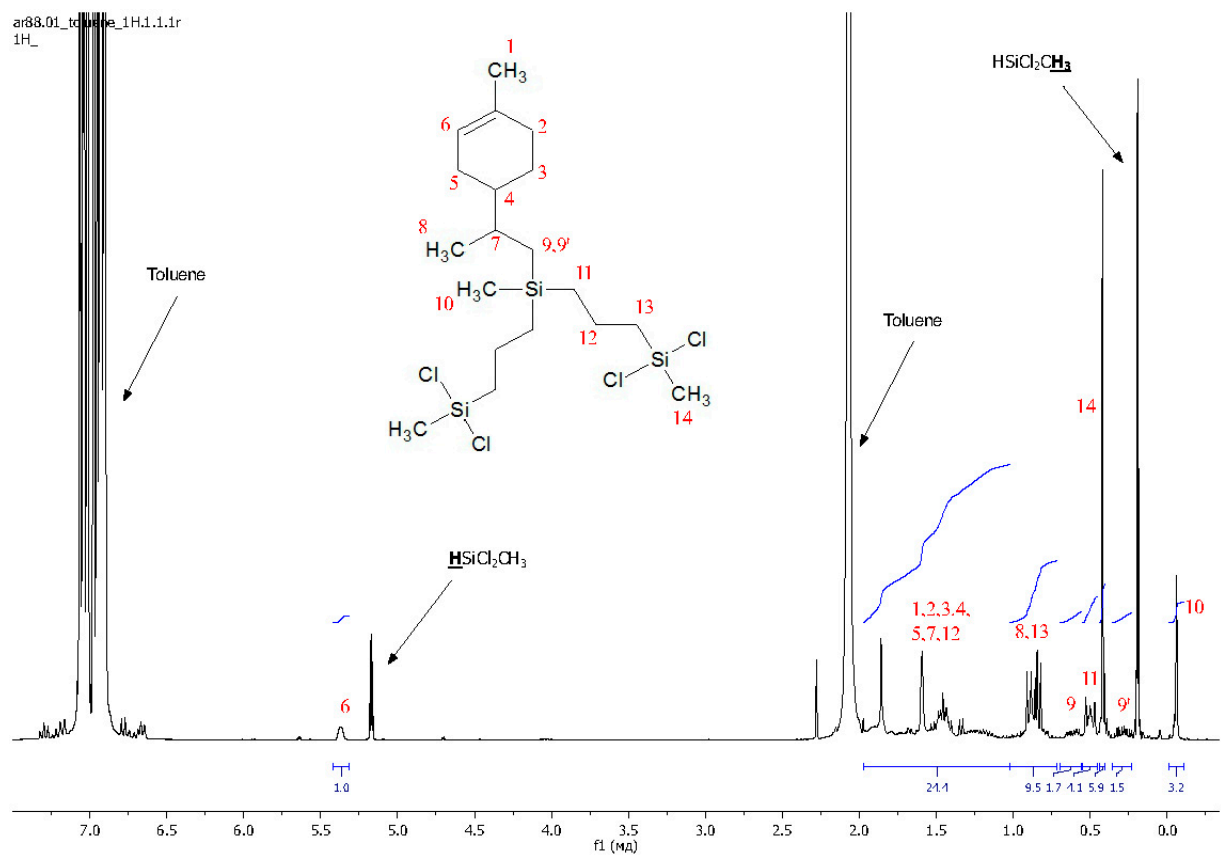

Figure S8. <sup>1</sup>H NMR spectrum of *Lim-G<sub>1</sub>Cl<sub>4</sub>*.

ar195.1.1.1.1r

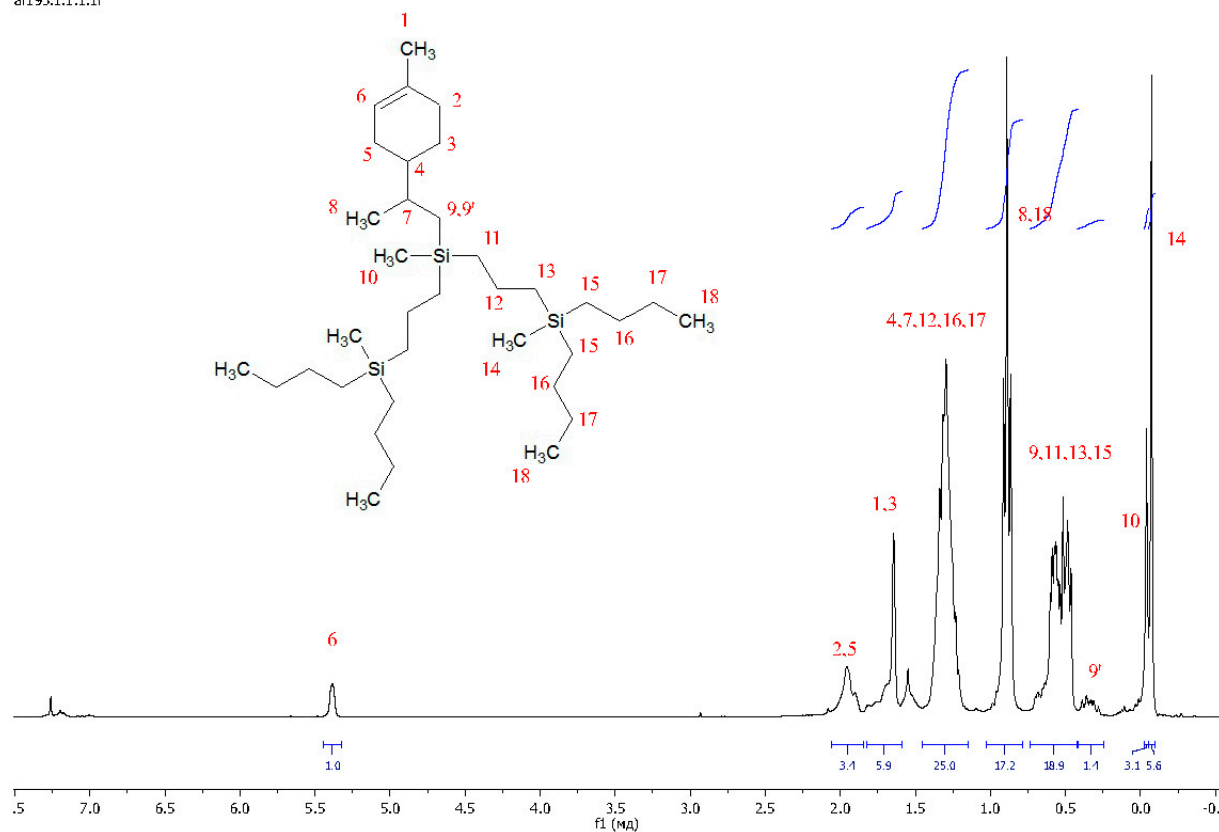

Figure S9. <sup>1</sup>H NMR spectrum of *Lim-G<sub>1</sub>Bu<sup>4</sup>*.

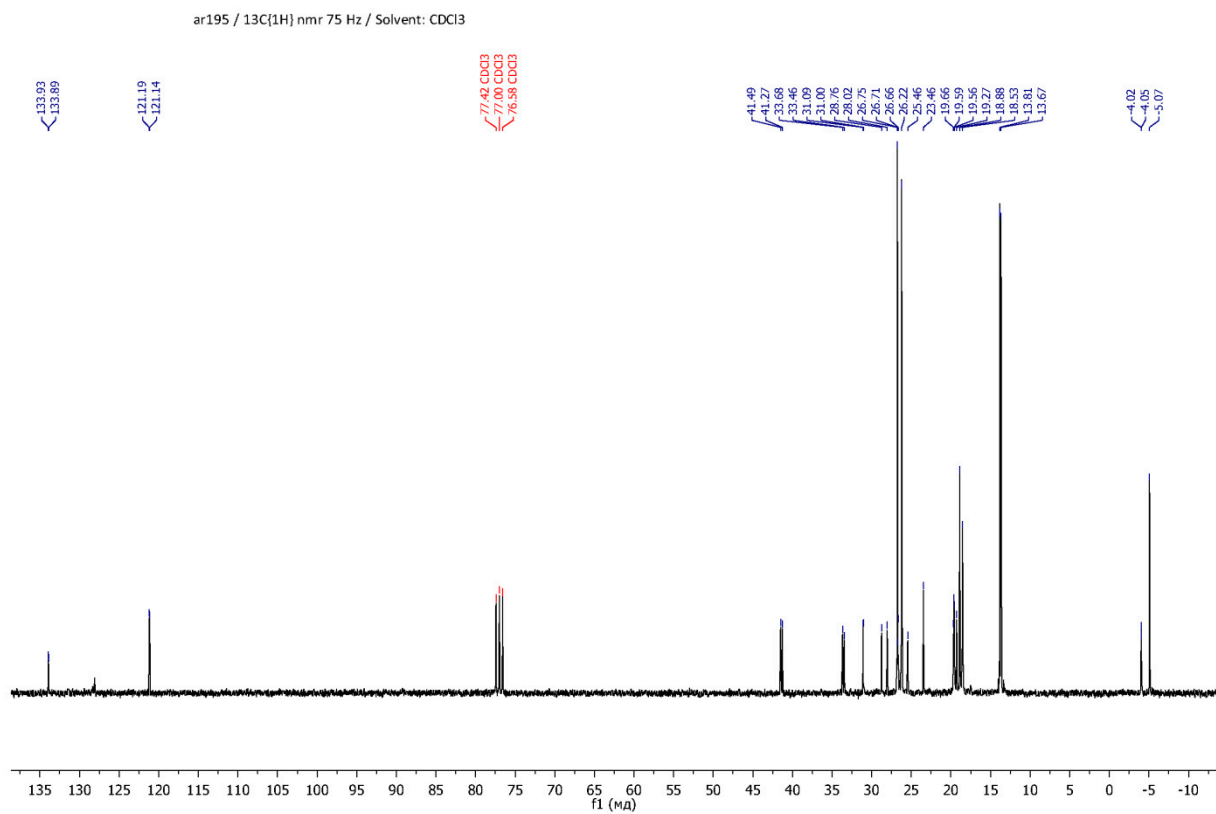

Figure S10. <sup>13</sup>C NMR spectrum of *Lim-G<sub>1</sub>Bu<sup>4</sup>*.

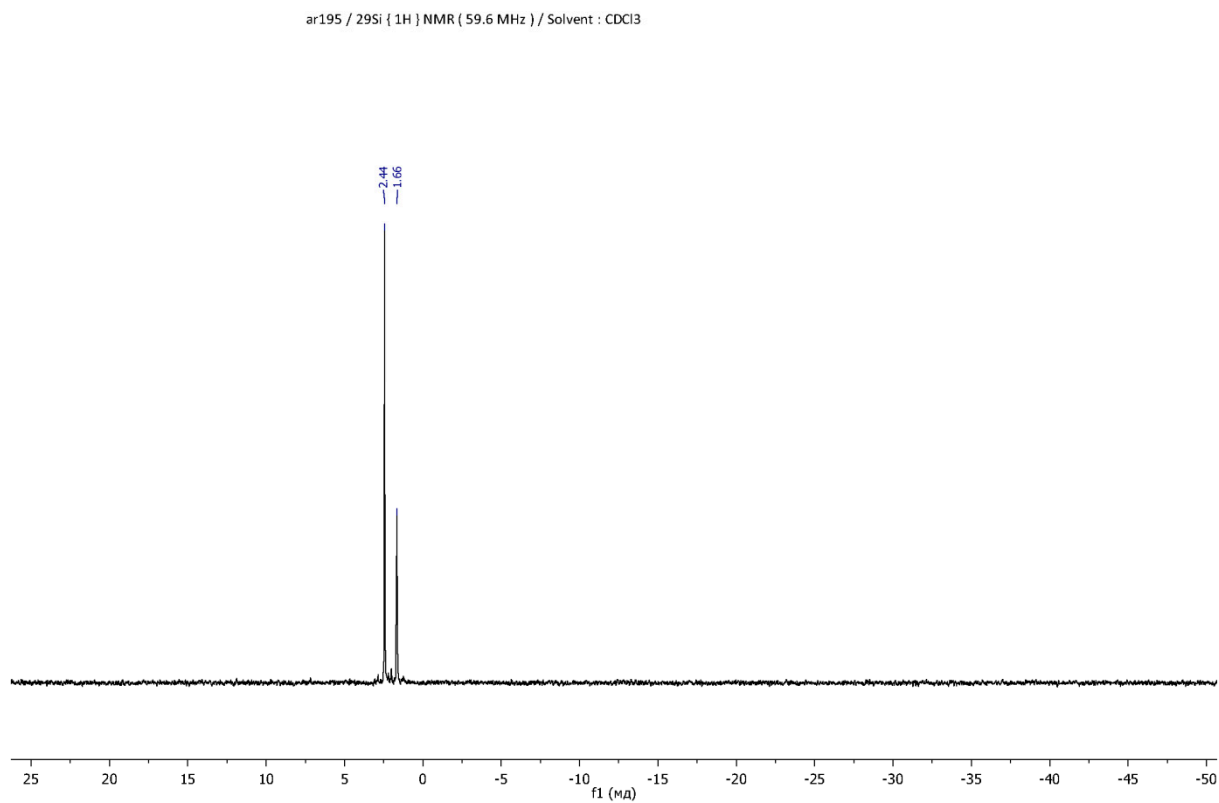

Figure S11.  $^{29}\text{Si}$  NMR spectrum of *Lim-G<sub>1</sub>Bu<sup>4</sup>*.

bkk20.001.fid

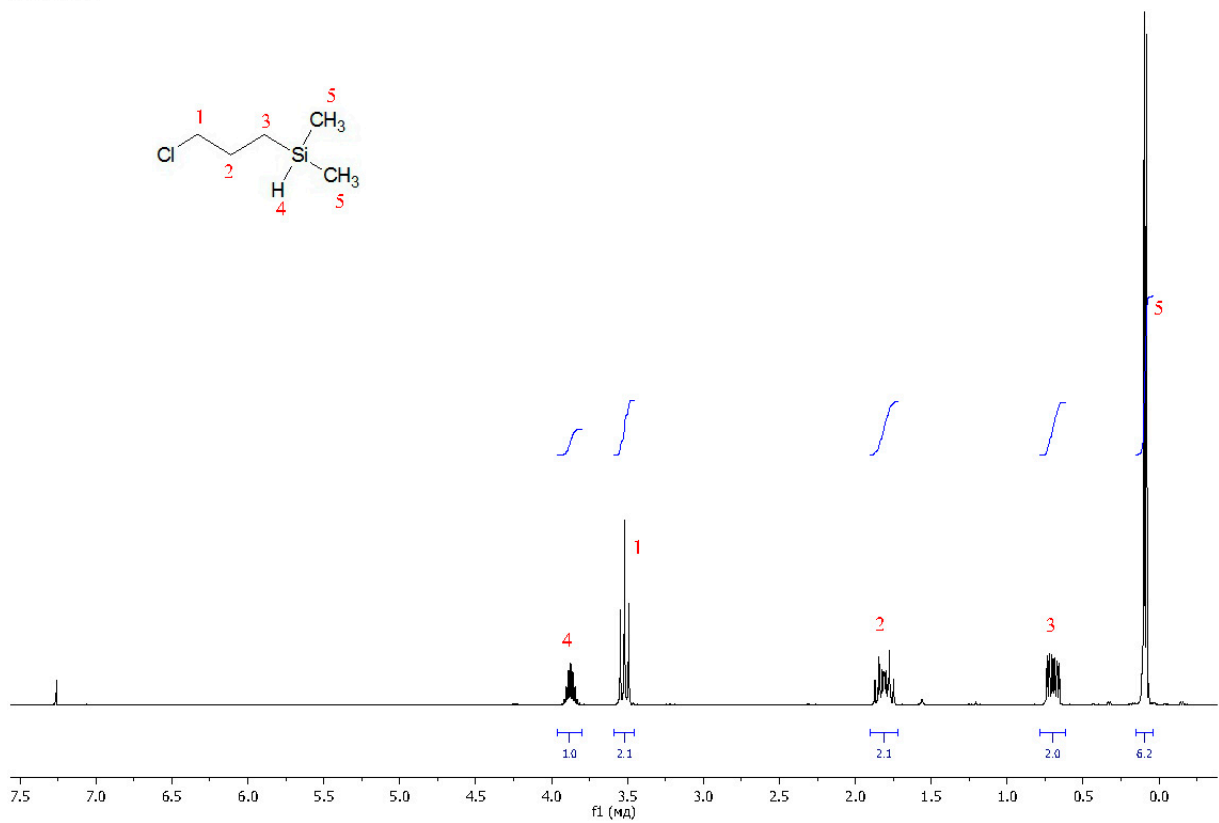

Figure S12.  $^1\text{H}$  NMR spectrum of 3-chloropropyldimethylsilane.

ar117.003.1.fid  
1H

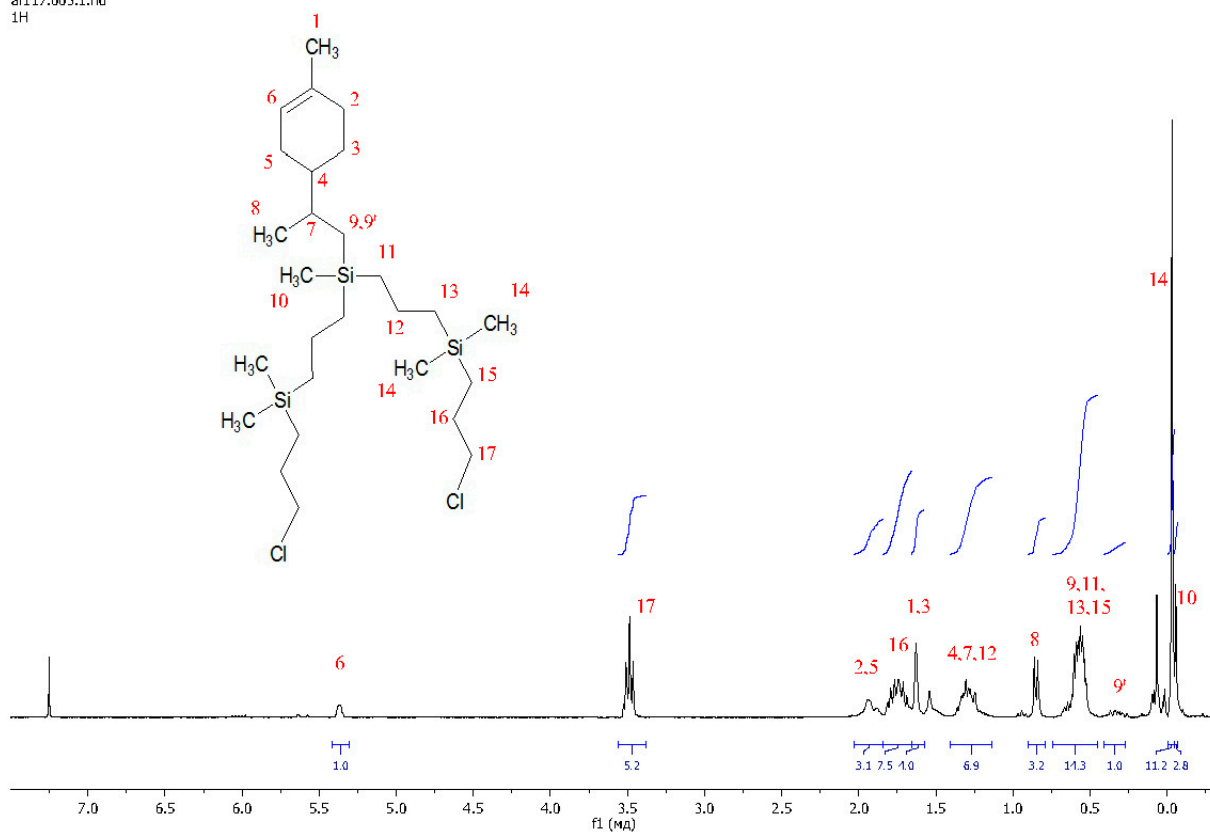

Figure S13.  $^1\text{H}$  NMR spectrum of  $\text{Lim-G}_0(\text{PrCl})^2$ .

ar208.002

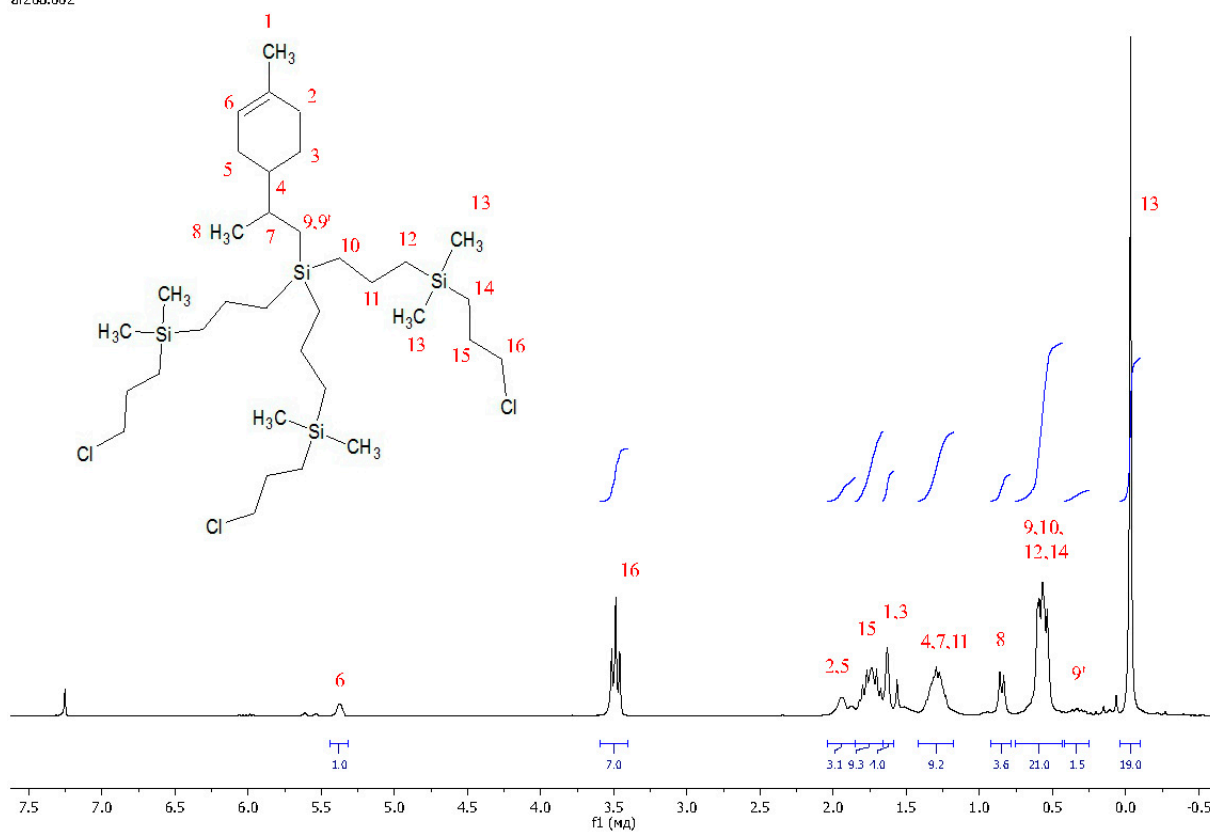

Figure S14.  $^1\text{H}$  NMR spectrum of  $\text{Lim-G}_1(\text{PrCl})^3$ .



ar2724 005 1 f1d  
1f

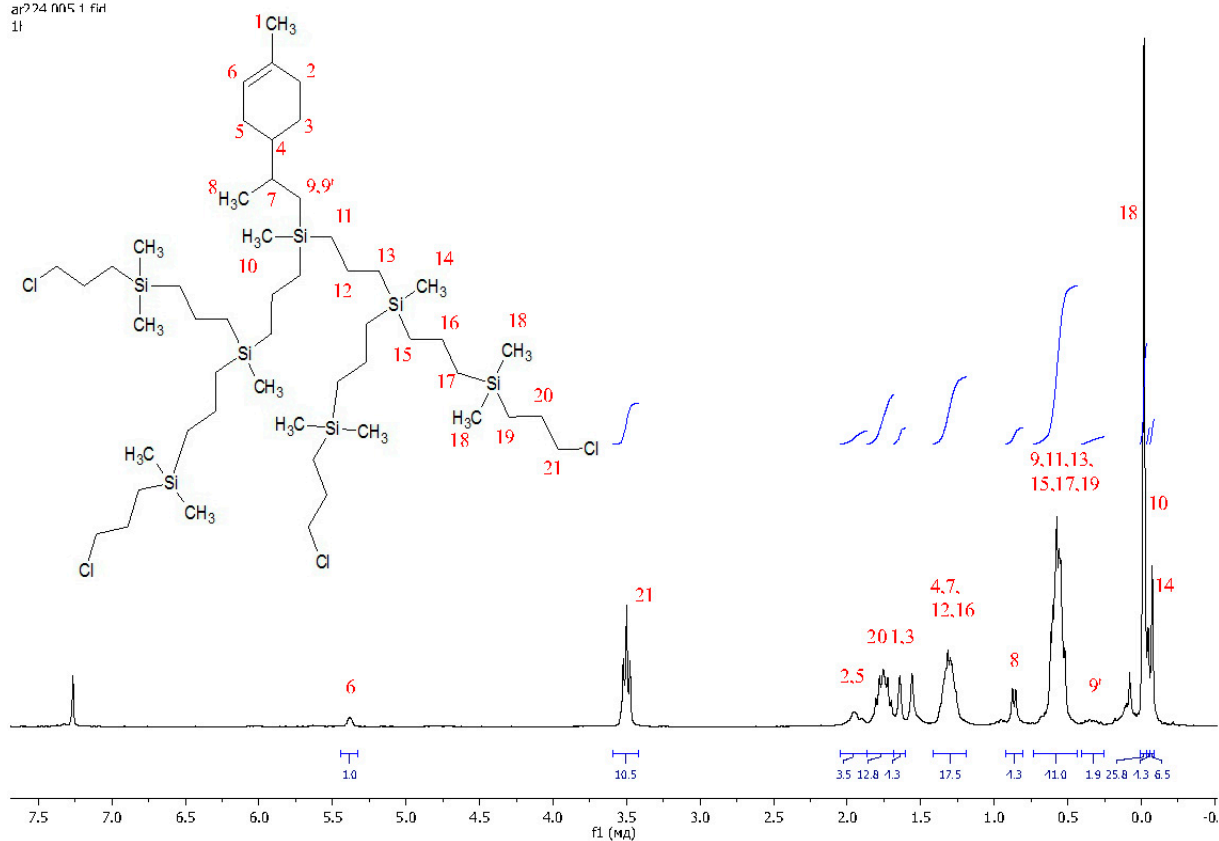

Figure S15.  $^1\text{H}$  NMR spectrum of  $\text{Lim-G}_2(\text{PrCl})^4$ .

ar143.003

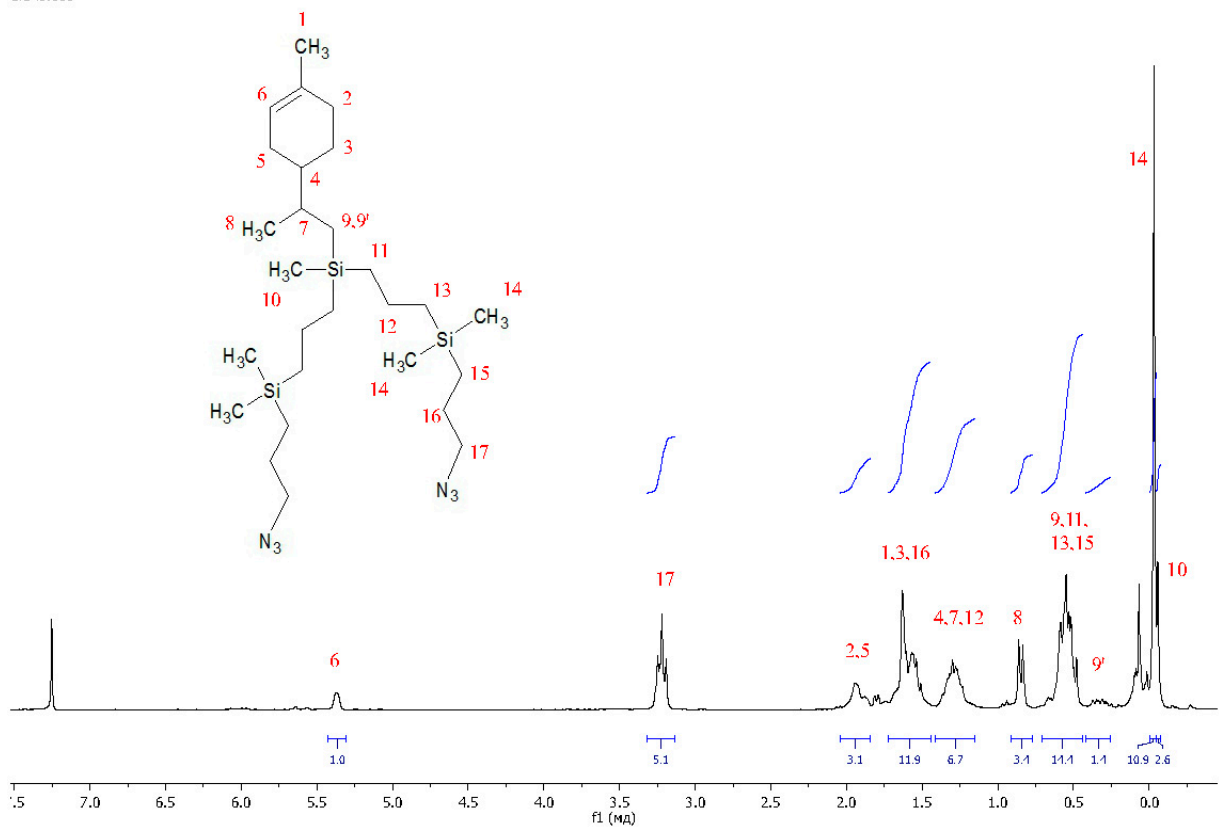

Figure S16.  $^1\text{H}$  NMR spectrum of  $\text{Lim-G}_0(\text{PrN}_3)^2$ .

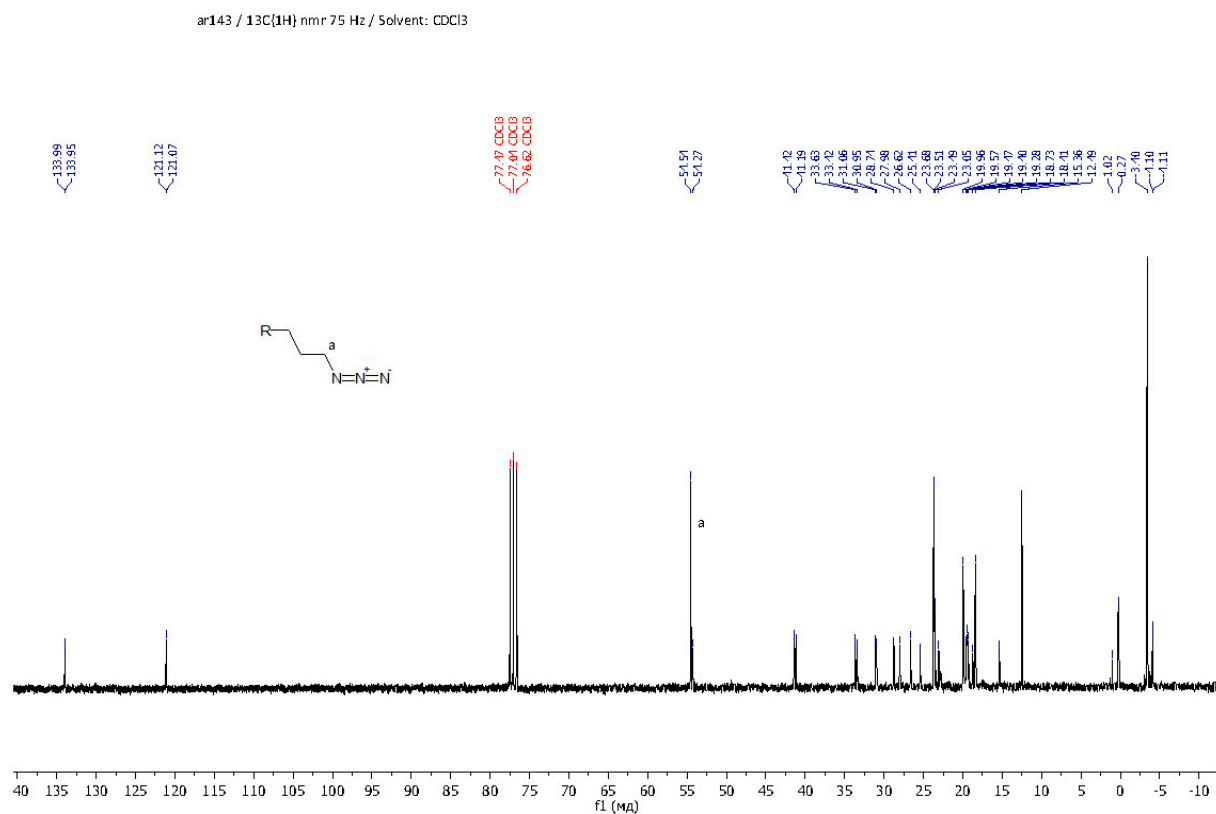

Figure S17.  $^{13}\text{C}$  NMR spectrum of  $\text{Lim-G}_0(\text{PrN}_3)^2$ .

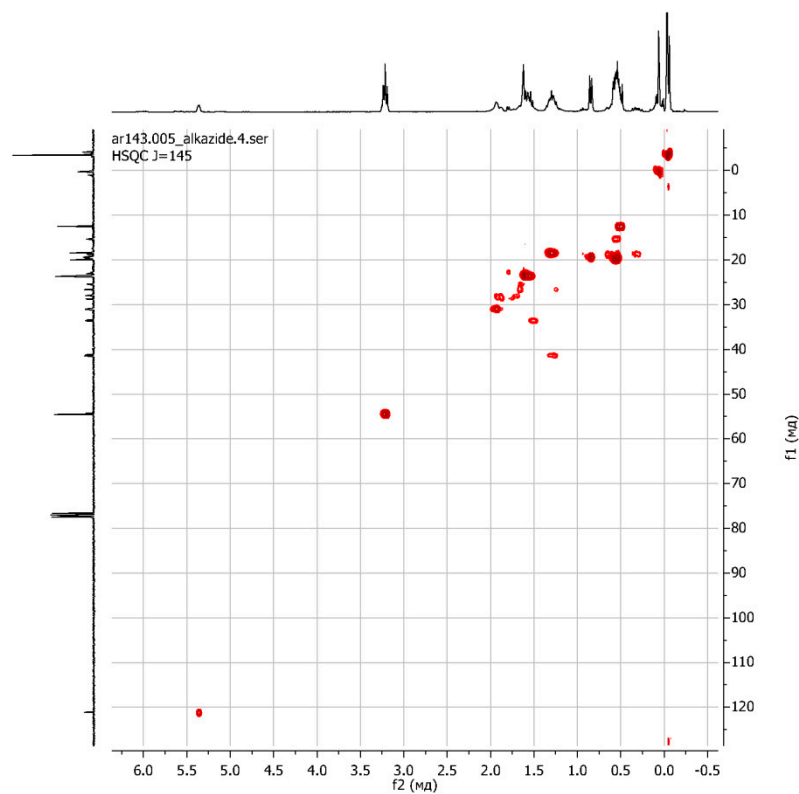

Figure S18.  $\{^1\text{H} \ ^{13}\text{C}\}$  HSQC NMR spectrum of  $\text{Lim-G}_0(\text{PrN}_3)^2$ .

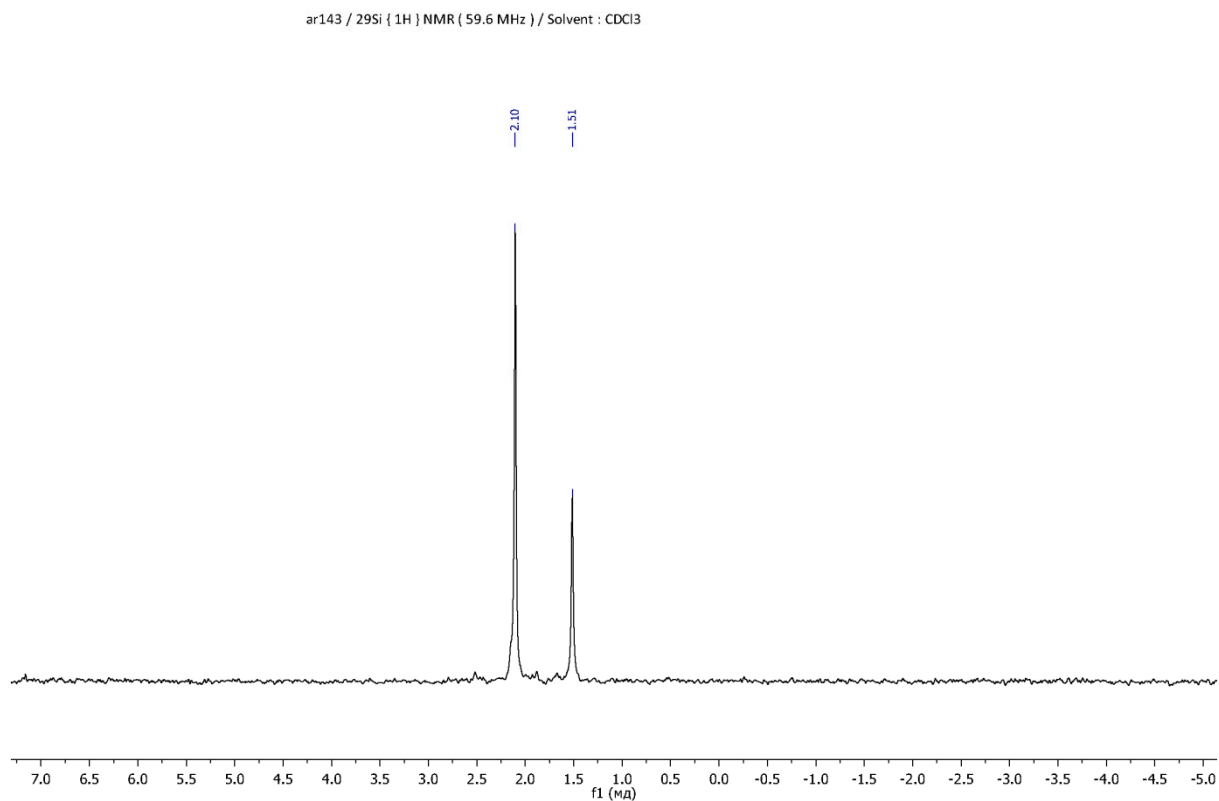

Figure S19.  $^{29}\text{Si}$  NMR spectrum of  $\text{Lim-G}_0(\text{PrN}_3)^2$ .

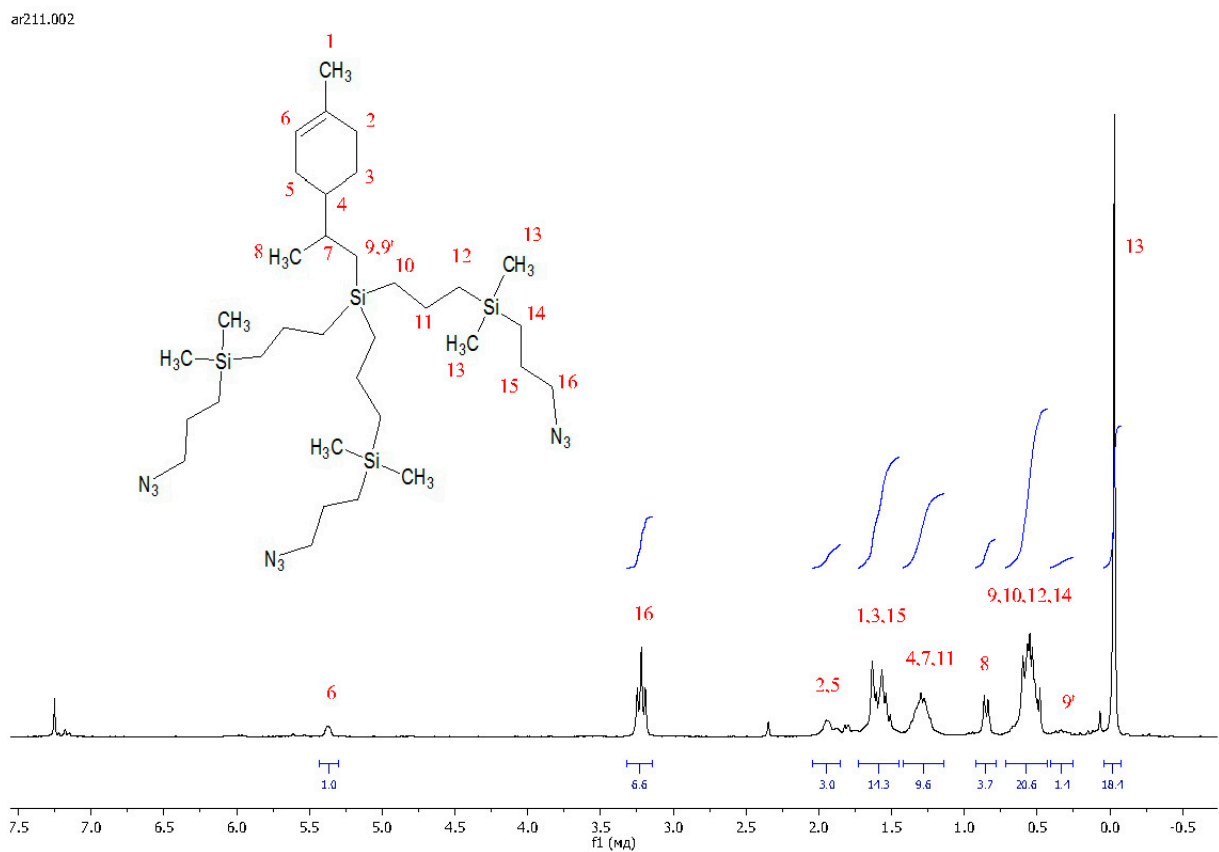

Figure S20.  $^1\text{H}$  NMR spectrum of  $\text{Lim-G}_1(\text{PrN}_3)^3$ .

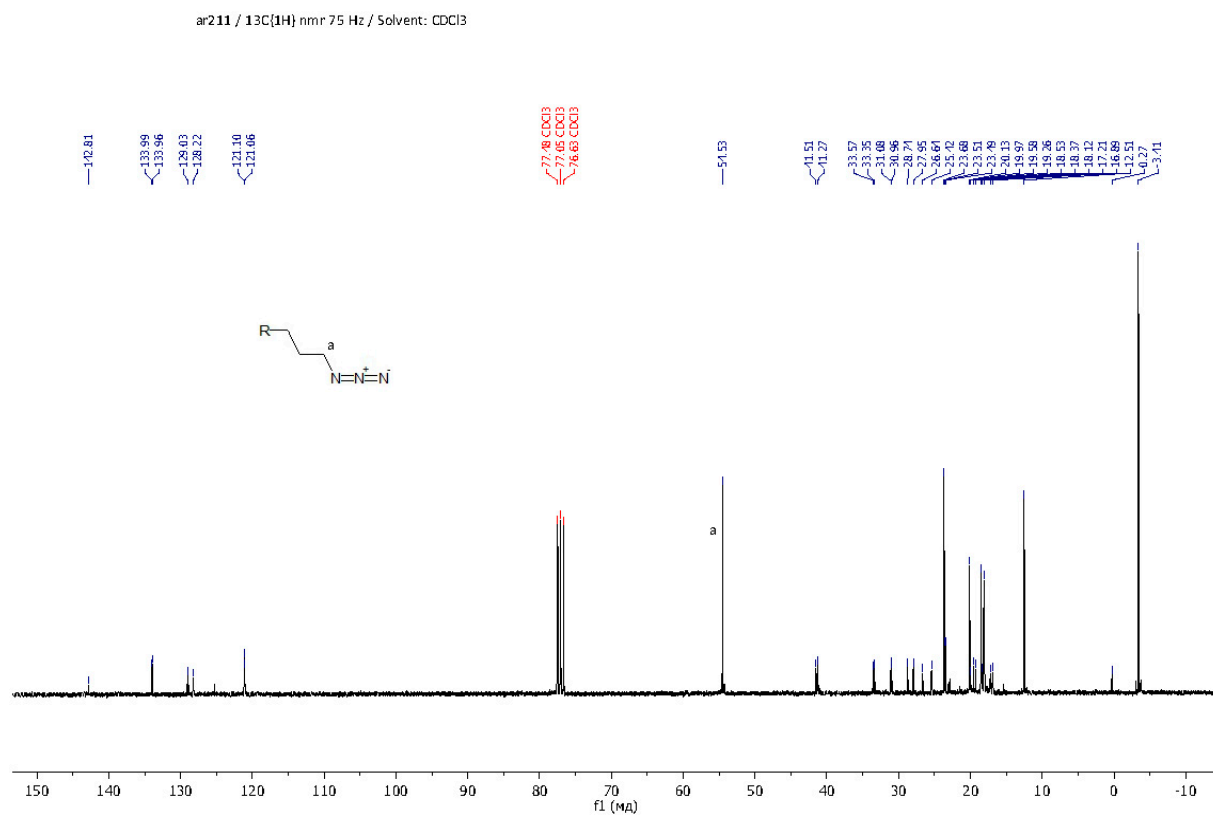

Figure S21.  $^{13}\text{C}$  NMR spectrum of  $\text{Lim-G}_1(\text{PrN}_3)^3$ .

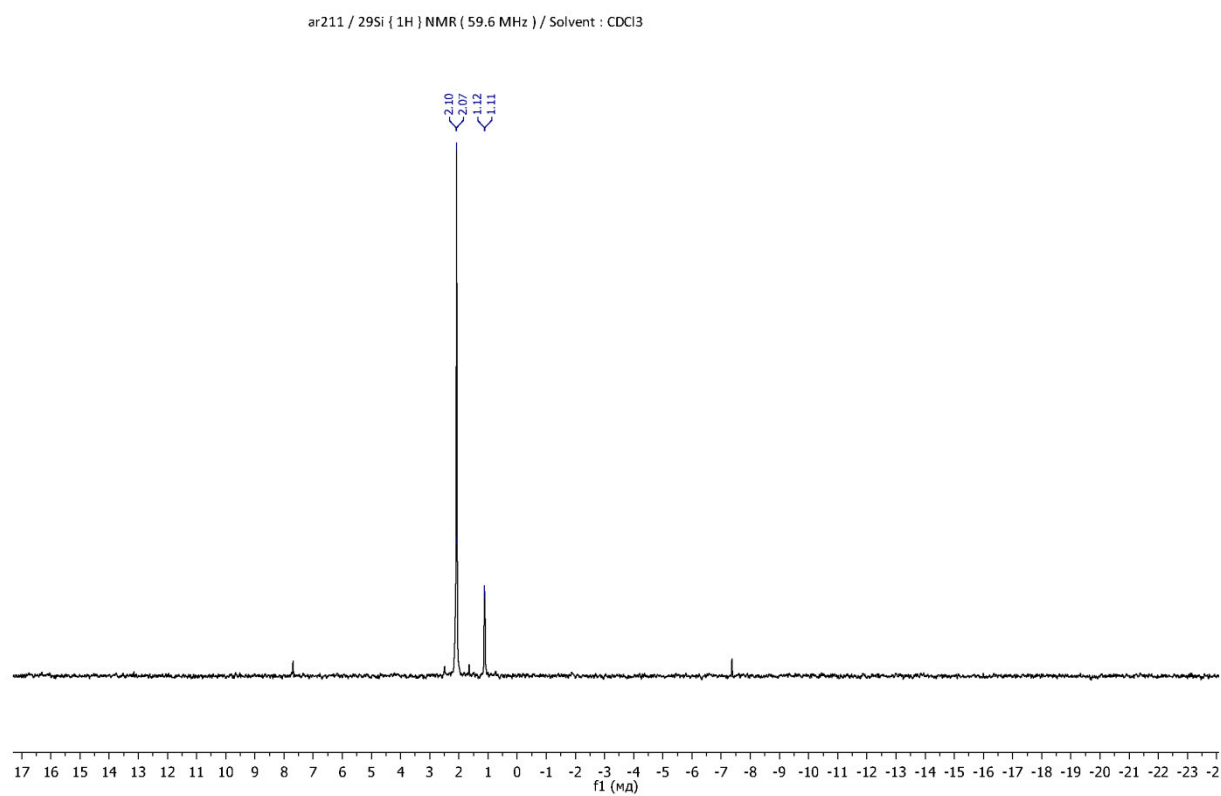

Figure S22.  $^{29}\text{Si}$  NMR spectrum of  $\text{Lim-G}_1(\text{PrN}_3)^3$ .

ar228.001

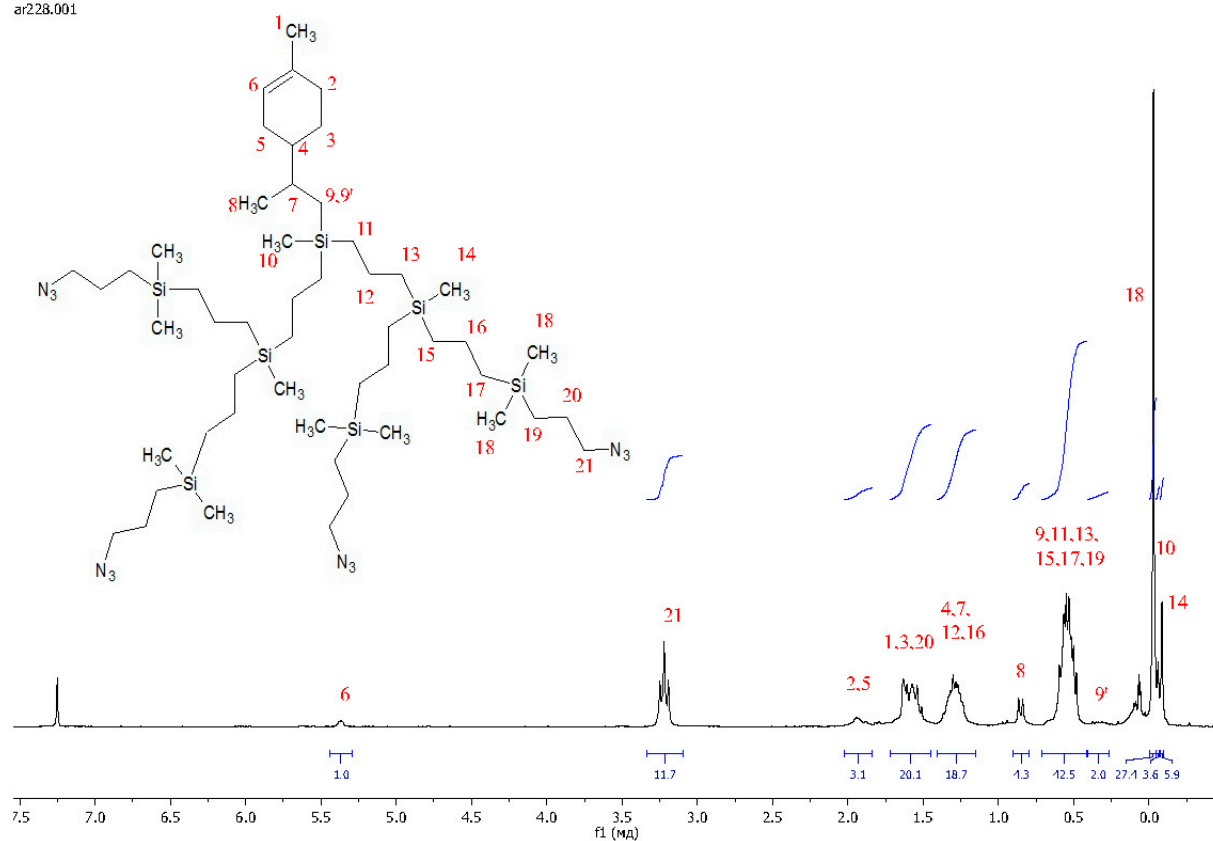Figure S23.  $^1\text{H}$  NMR spectrum of  $\text{Lim-G}_2(\text{PrN}_3)_4$ .ar228 /  $^{13}\text{C}\{^1\text{H}\}$  nmr 75 Hz / Solvent:  $\text{CDCl}_3$ 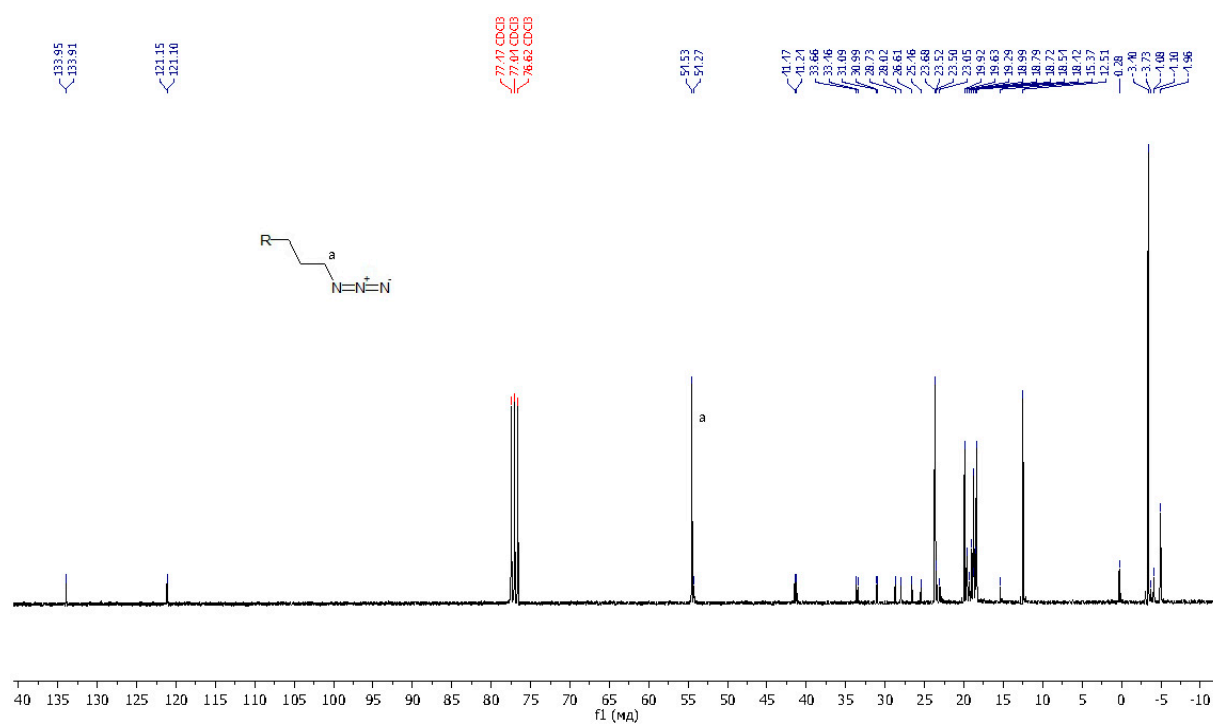Figure S24.  $^{13}\text{C}$  NMR spectrum of  $\text{Lim-G}_2(\text{PrN}_3)_4$ .

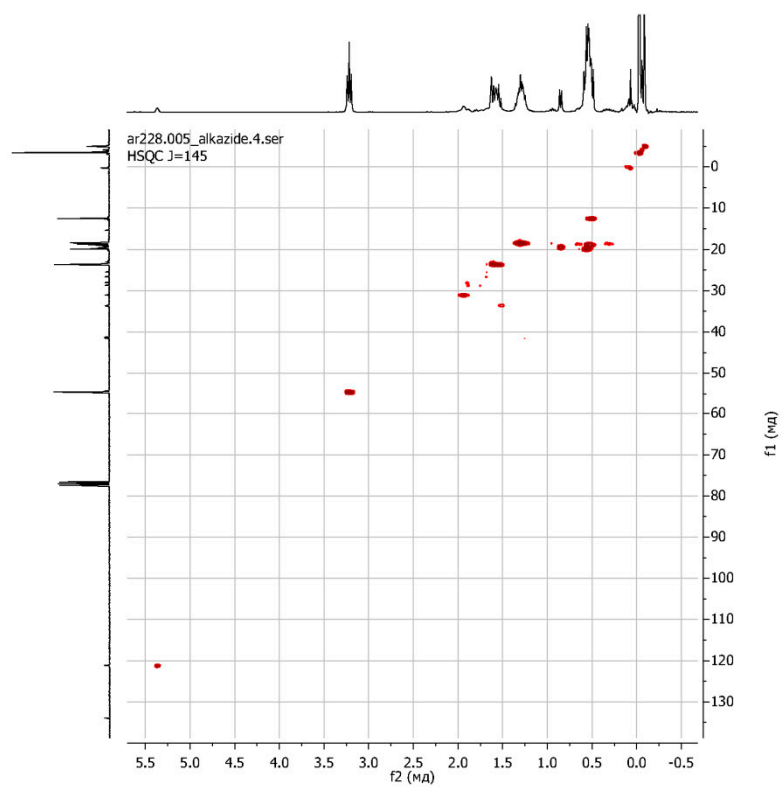

Figure S25.  $\{^1\text{H } ^{13}\text{C}\}$  HSQC NMR spectrum of  $\text{Lim-G}_2(\text{PrN}_3)^4$ .

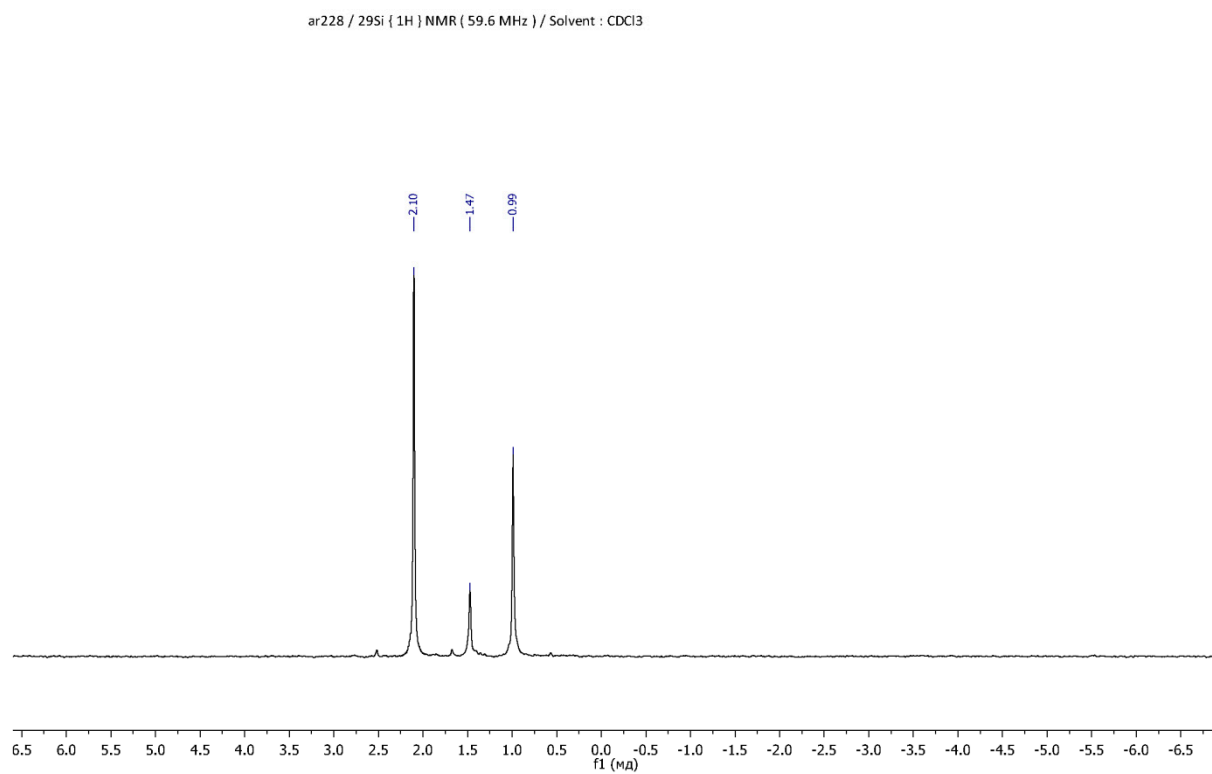

Figure S26.  $^{29}\text{Si}$  NMR spectrum of  $\text{Lim-G}_2(\text{PrN}_3)^4$ .

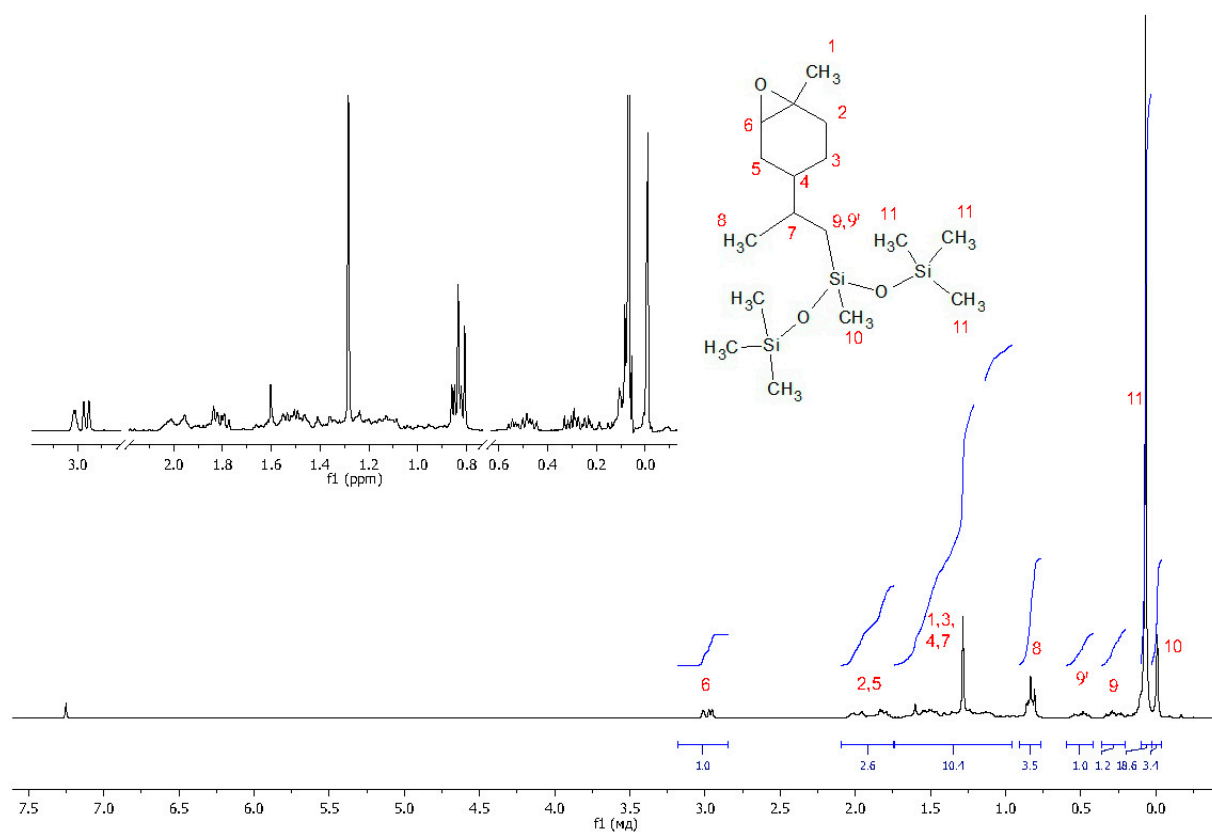

Figure S27.  $^1\text{H}$  NMR spectrum of *LimOx-G<sub>0.5</sub>TMS<sup>2</sup>*.

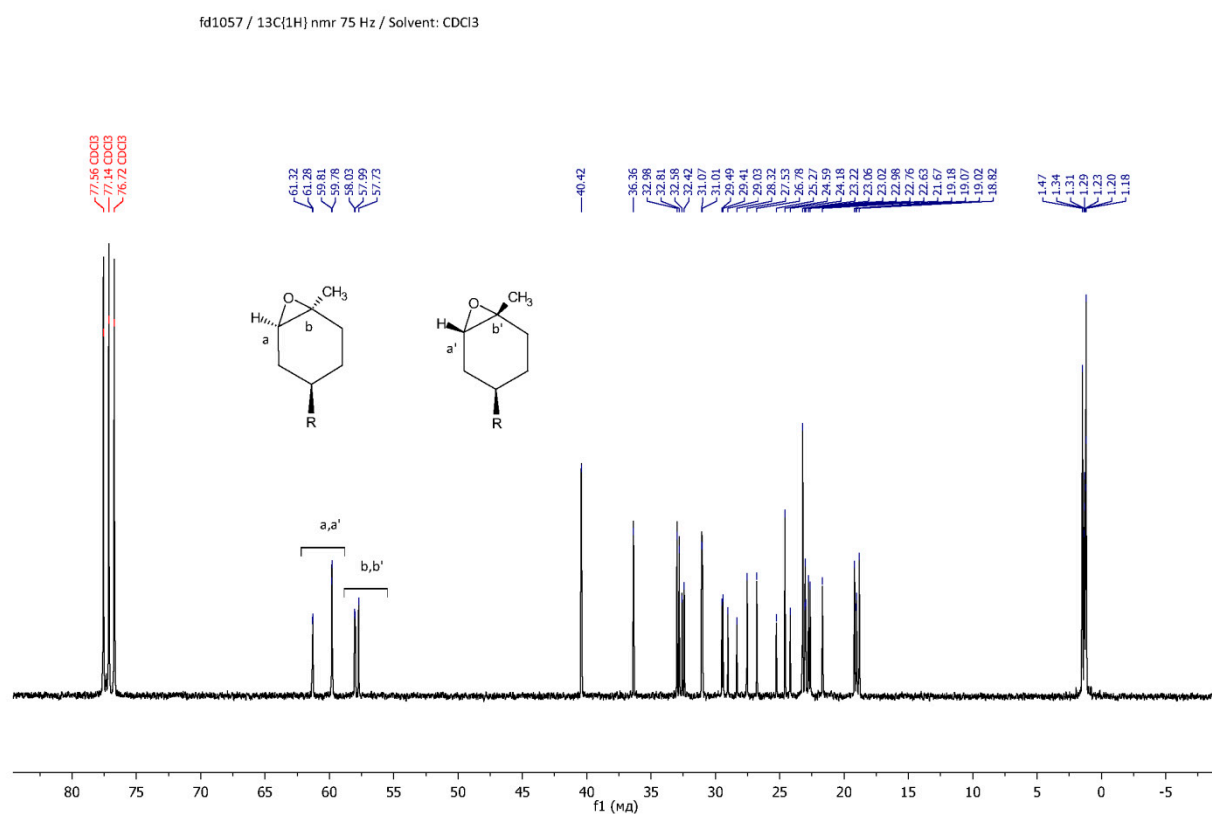

Figure S28.  $^{13}\text{C}$  NMR spectrum of *LimOx-G<sub>0.5</sub>TMS<sup>2</sup>*.

fd1057 / APT 75 Hz / Solvent: CDCl<sub>3</sub>

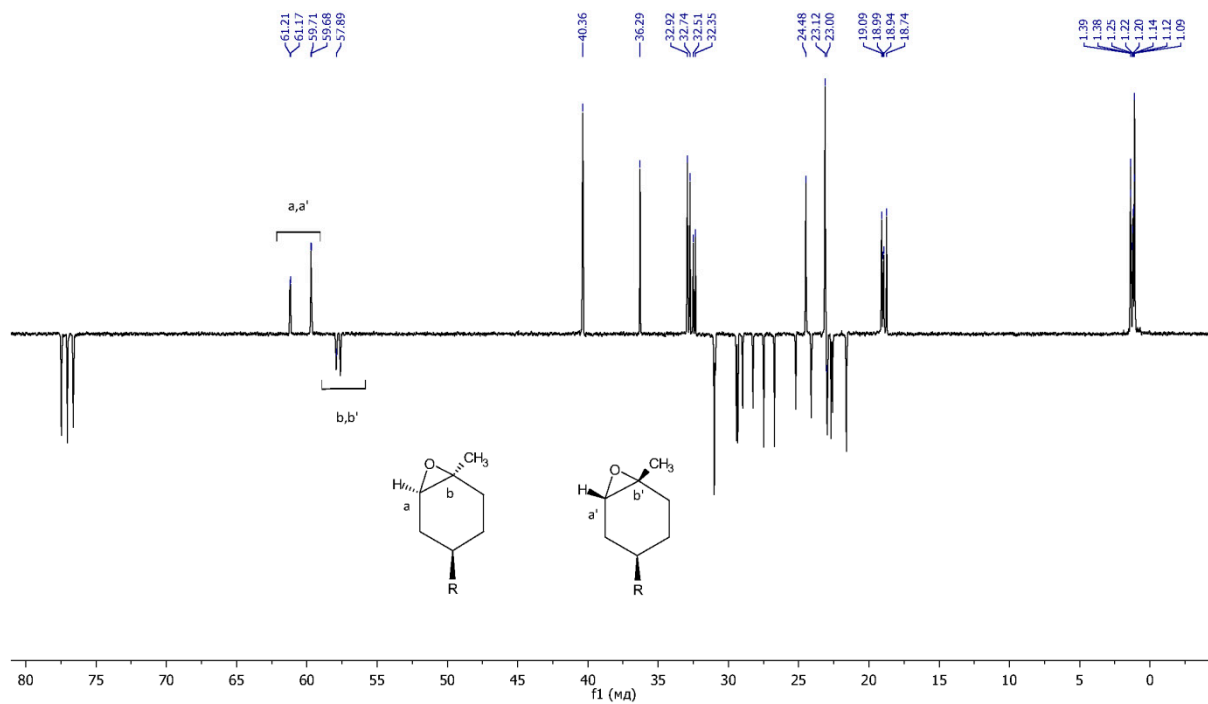

Figure S29. APT NMR spectrum of *LimOx-G<sub>0,5</sub>TMS<sup>2</sup>*.

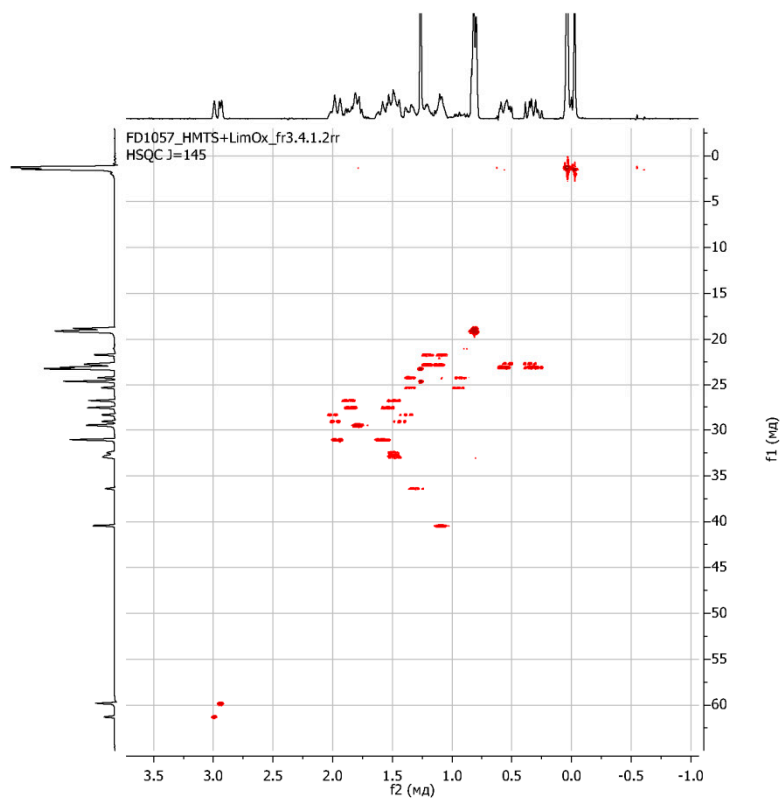

Figure S30.  $\{^1\text{H} \ ^{13}\text{C}\}$  HSQC NMR spectrum of *LimOx-G<sub>0,5</sub>TMS<sup>2</sup>*.



fd1057 /  $^{29}\text{Si}$  { 1H } NMR ( 59.6 MHz ) / Solvent :  $\text{CDCl}_3$

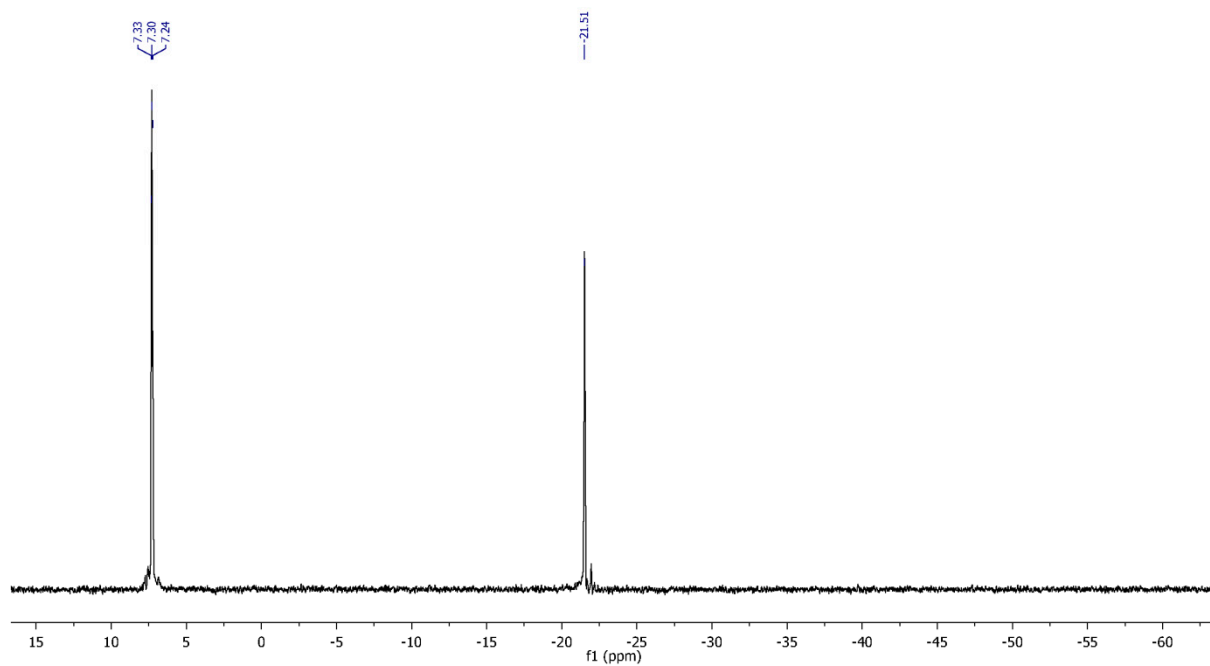

Figure S31.  $^{29}\text{Si}$  NMR spectrum of *LimOx-G<sub>0.5</sub>TMS<sup>2</sup>*.

ar102.5.1.1.1r

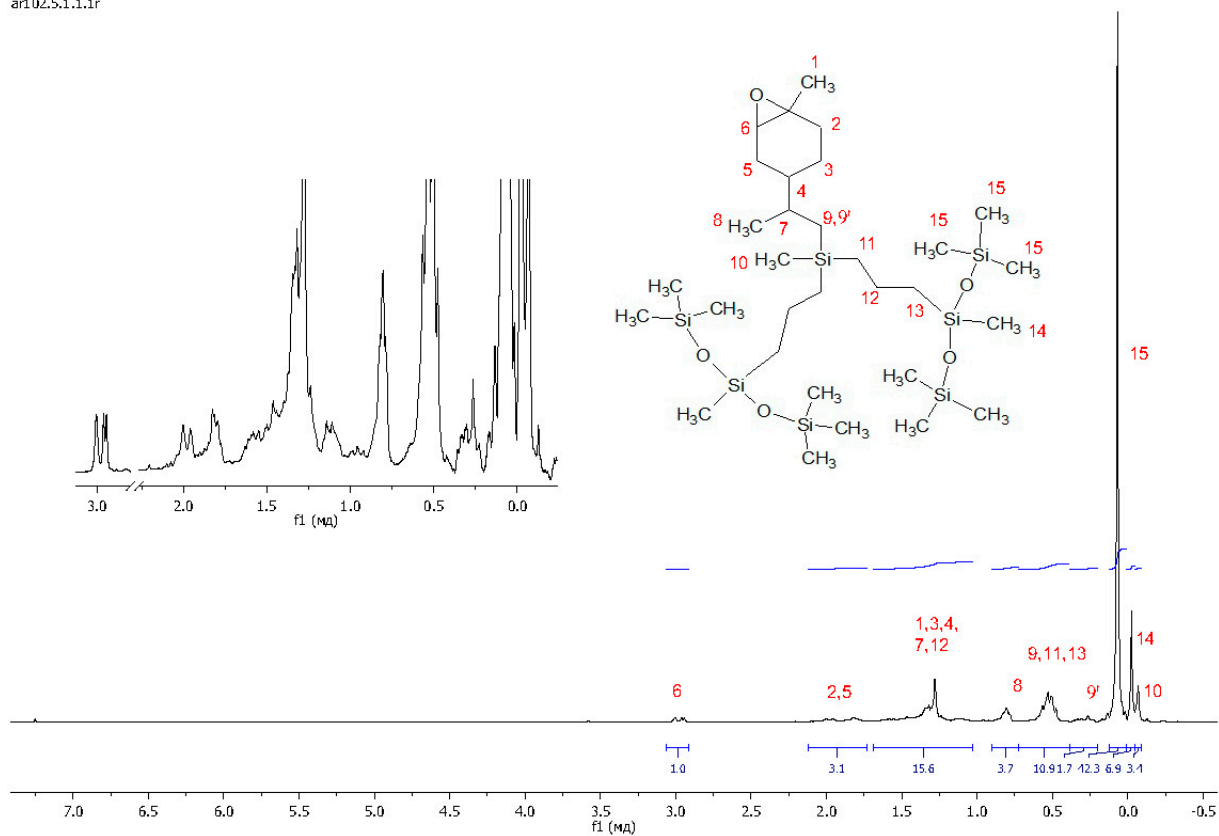

Figure S32.  $^1\text{H}$  NMR spectrum of *LimOx-G<sub>1.5</sub>TMS<sup>4</sup>*.

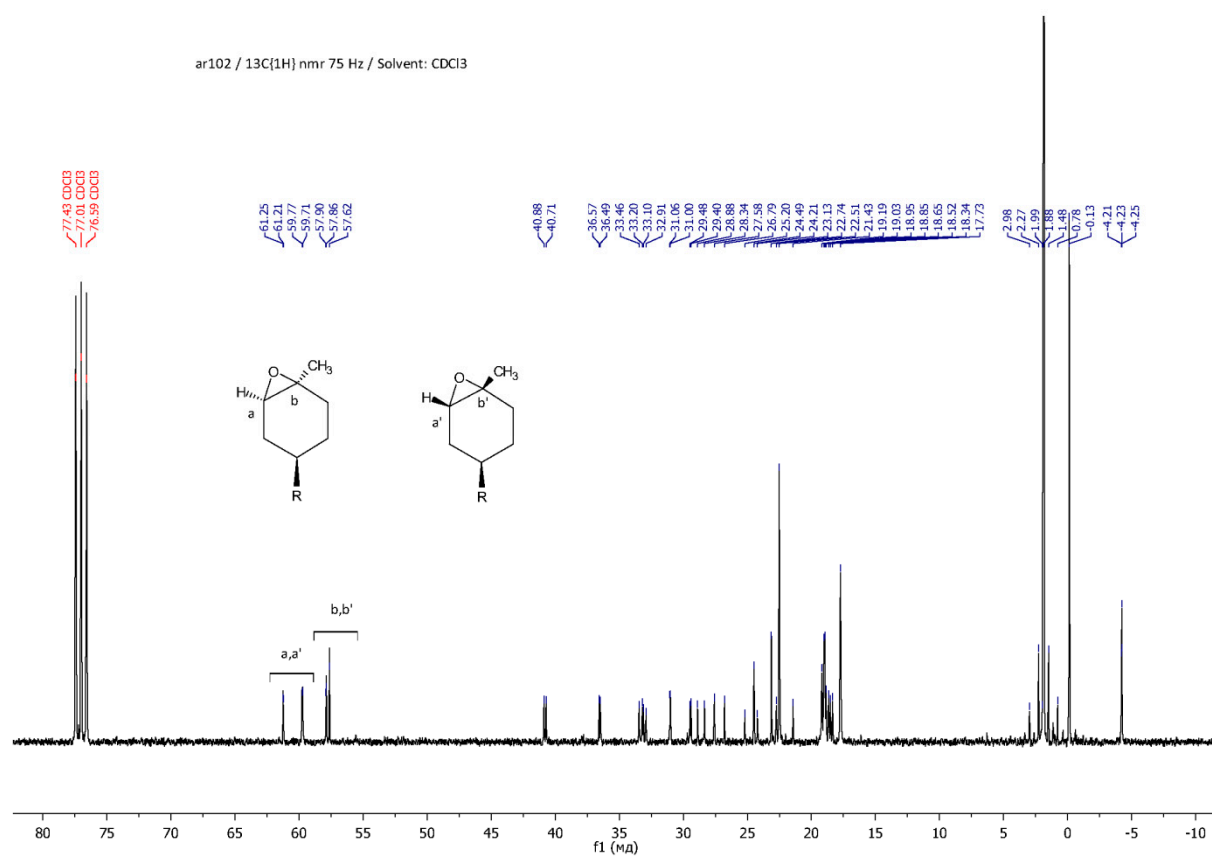

Figure S33.  $^{13}\text{C}$  NMR spectrum of *LimOx-G<sub>1,5</sub>TMS<sup>4</sup>*.

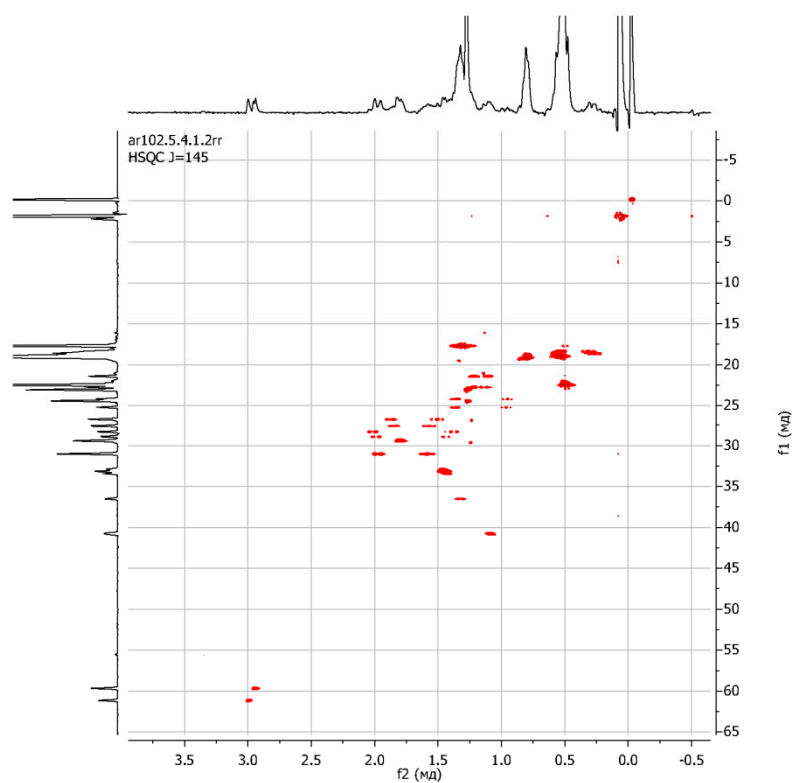

Figure S34.  $\{^1\text{H} \ ^{13}\text{C}\}$  HSQC NMR spectrum of *LimOx-G<sub>1,5</sub>TMS<sup>4</sup>*.

ar102 /  $^{29}\text{Si}$  {  $^1\text{H}$  } NMR ( 59.6 MHz ) / Solvent :  $\text{CDCl}_3$

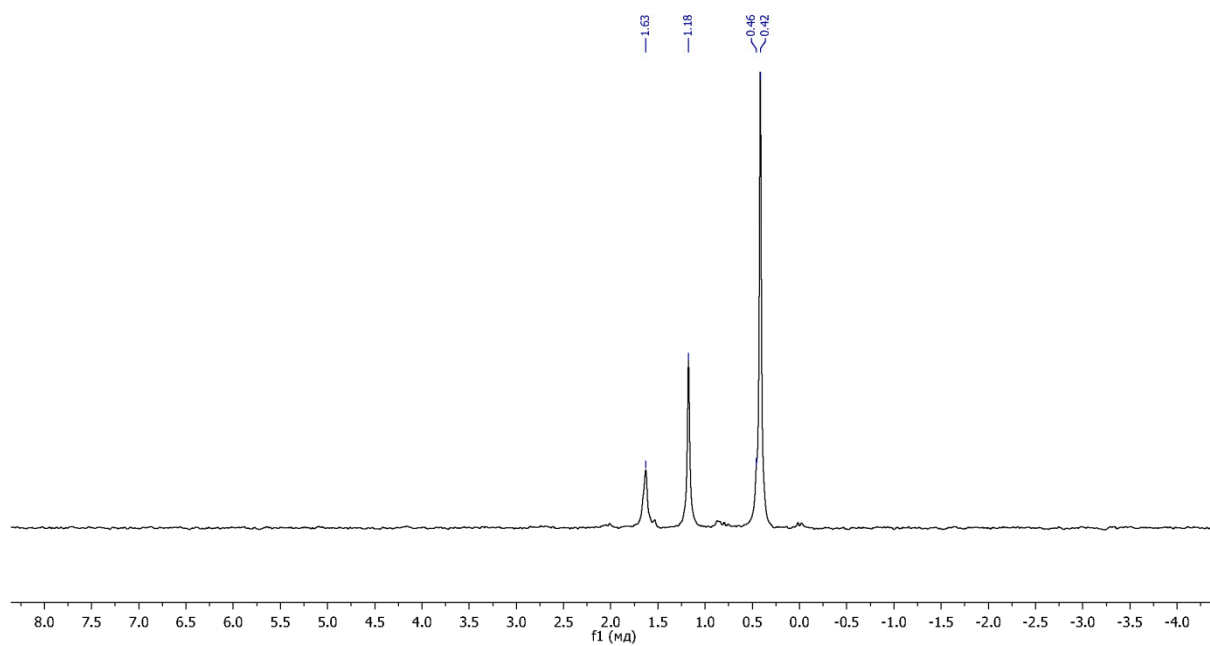

Figure S35.  $^{29}\text{Si}$  NMR spectrum of *LimOx-G<sub>1,5</sub>TMS<sup>4</sup>*.

ar109.002

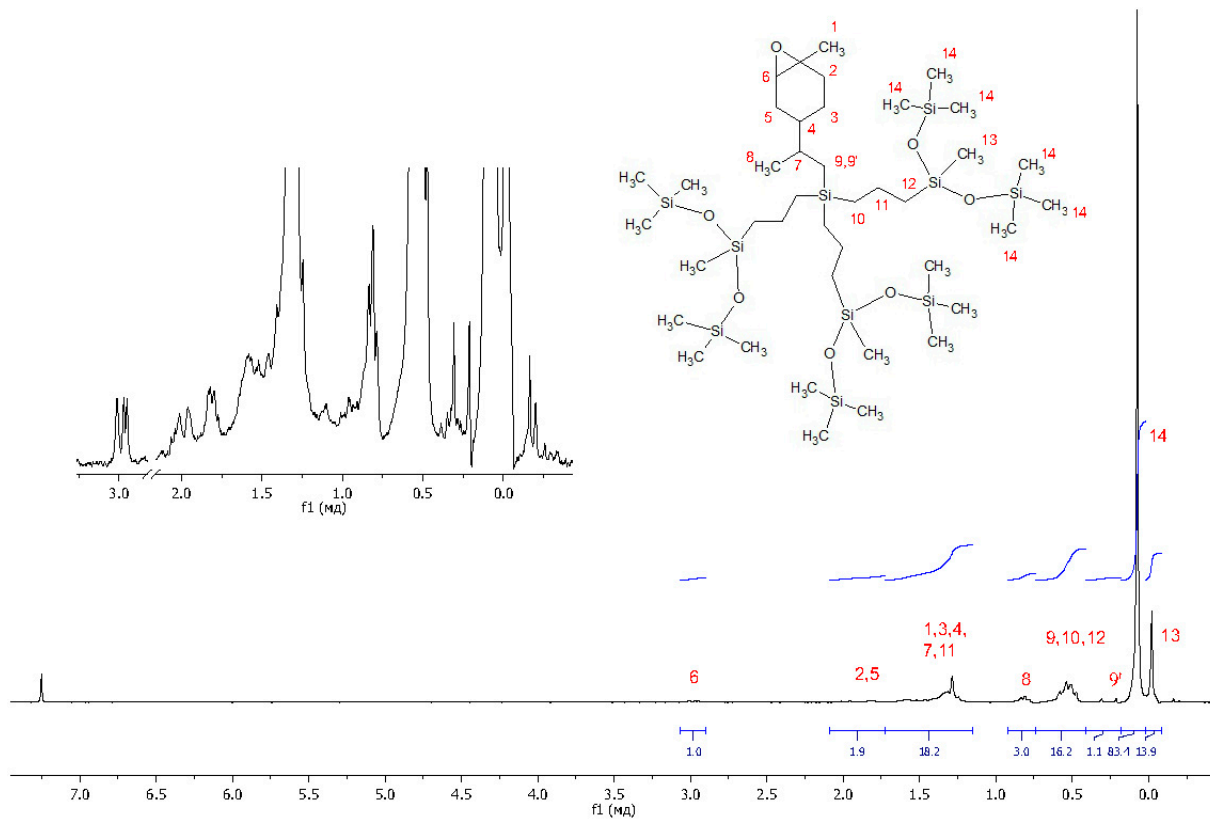

Figure S36.  $^1\text{H}$  NMR spectrum of *LimOx-G<sub>1,5</sub>TMS<sup>6</sup>*.

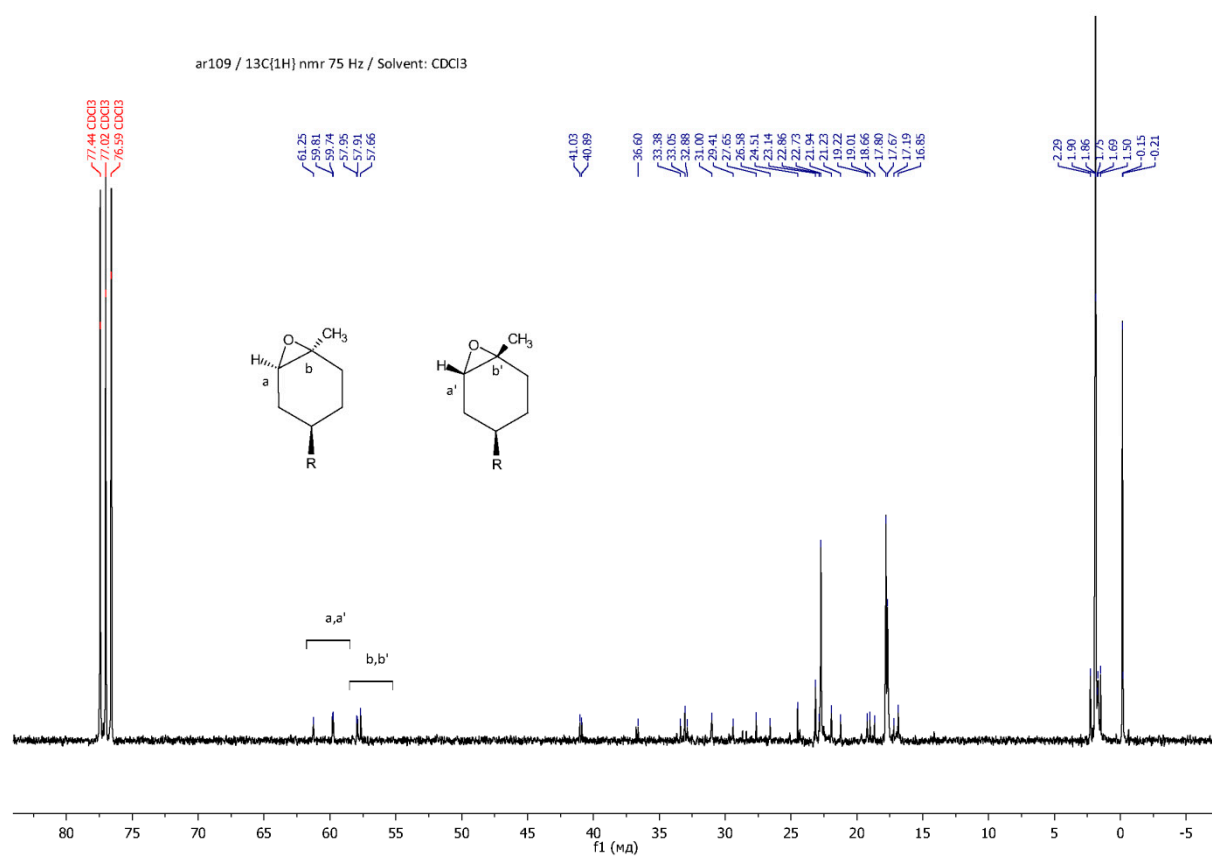

Figure S37.  $^{13}\text{C}$  NMR spectrum of *LimOx-G<sub>1,5</sub>TMS<sup>6</sup>*.

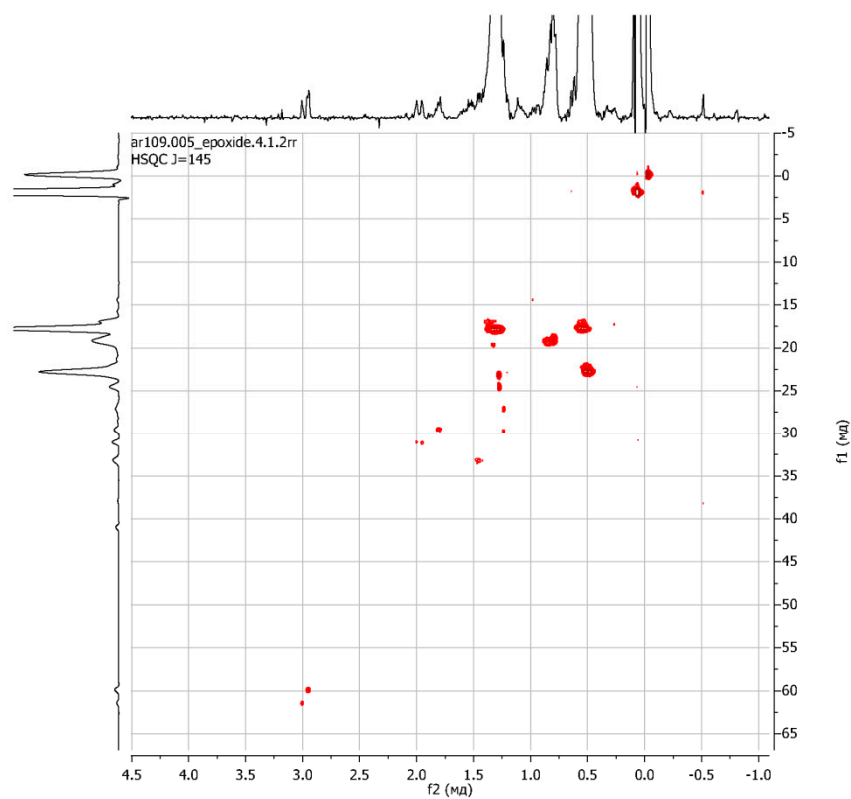

Figure S38.  $\{^1\text{H} \ ^{13}\text{C}\}$  HSQC NMR spectrum of *LimOx-G<sub>1,5</sub>TMS<sup>6</sup>*.

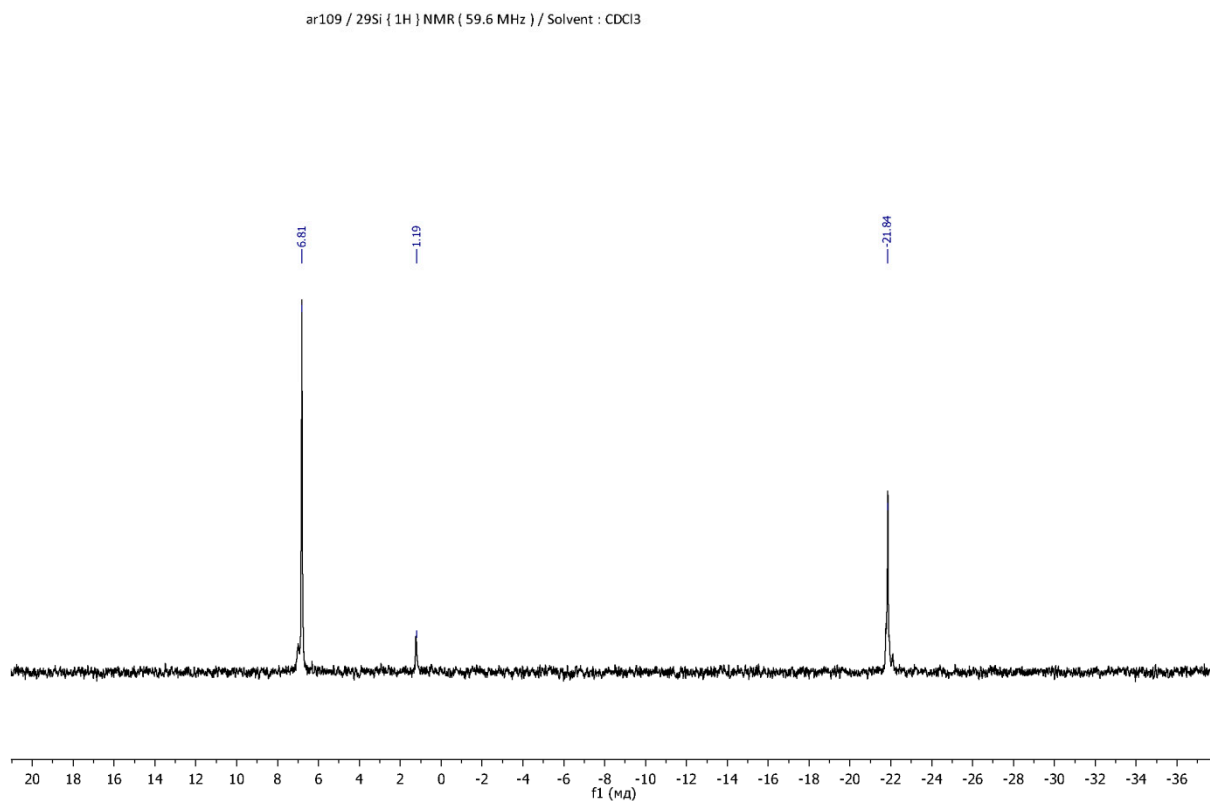

Figure S39.  $^{29}\text{Si}$  NMR spectrum of  $\text{LimOx-G}_{1.5}\text{TMS}^6$ .

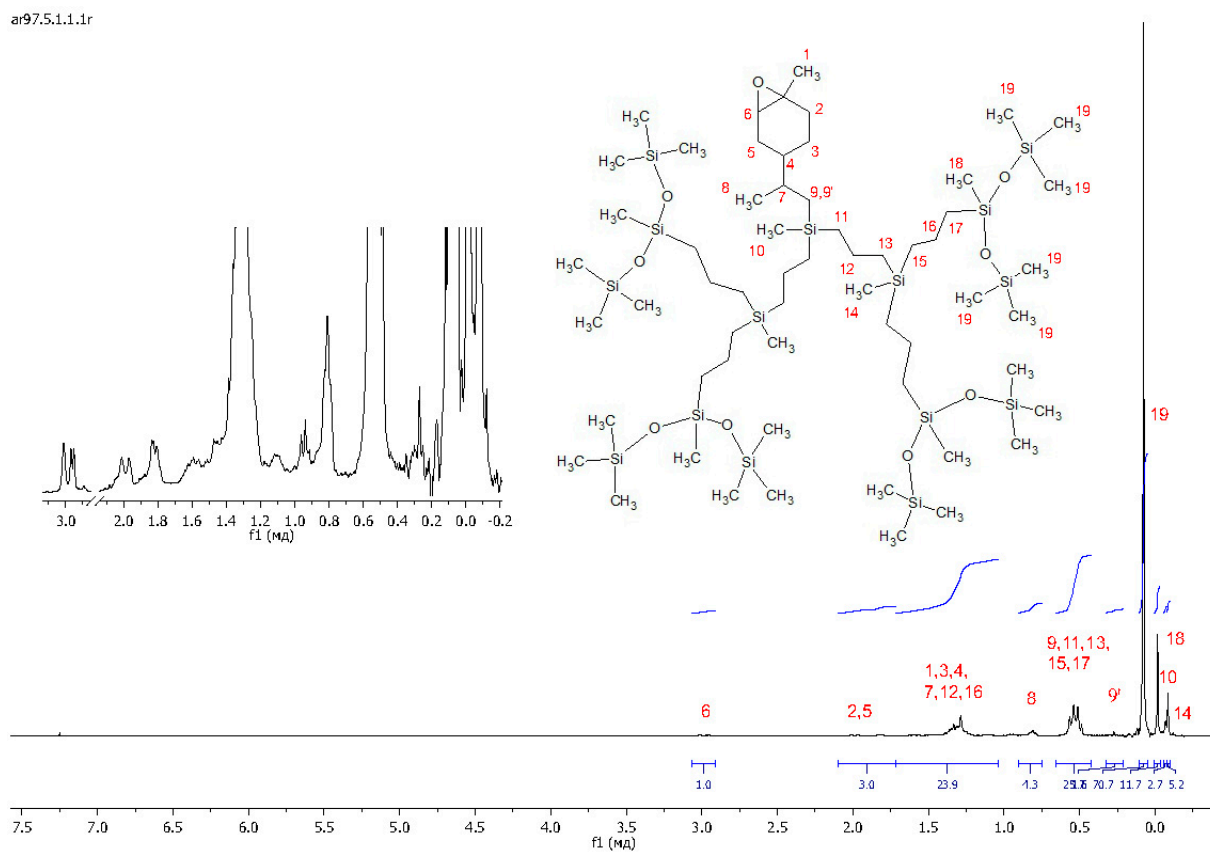

Figure S40.  $^1\text{H}$  NMR spectrum of  $\text{LimOx-G}_{2.5}\text{TMS}^8$ .

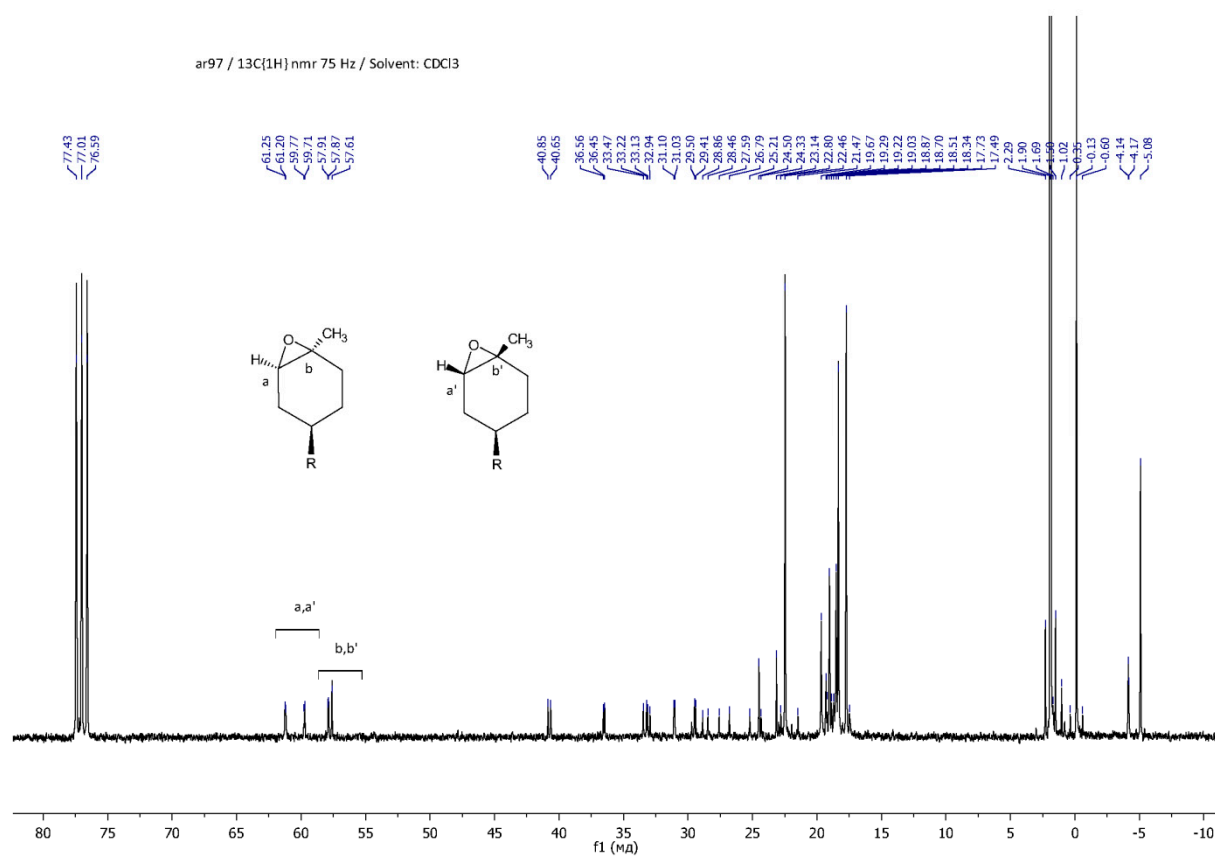

Figure S41.  $^{13}\text{C}$  NMR spectrum of *LimOx-G<sub>2,5</sub>TMS*<sup>8</sup>.

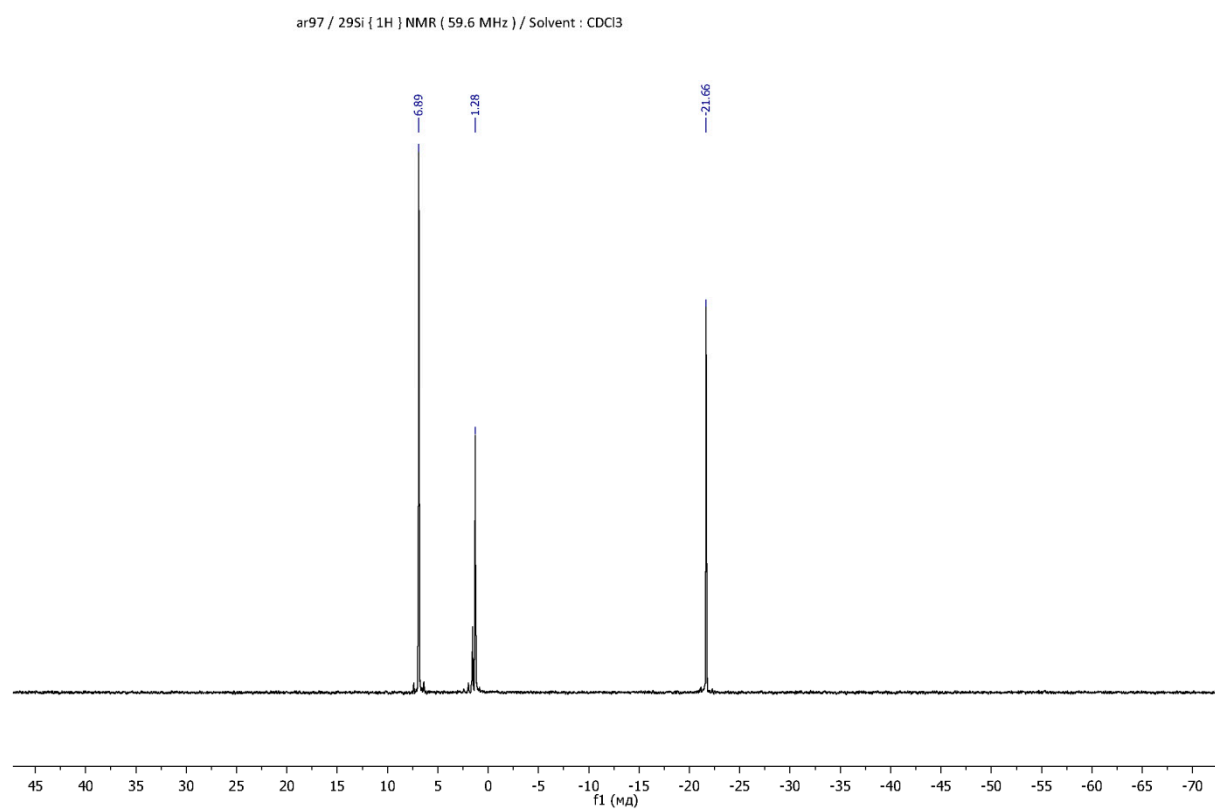

Figure S42.  $^{29}\text{Si}$  NMR spectrum of *LimOx-G<sub>2,5</sub>TMS*<sup>8</sup>.

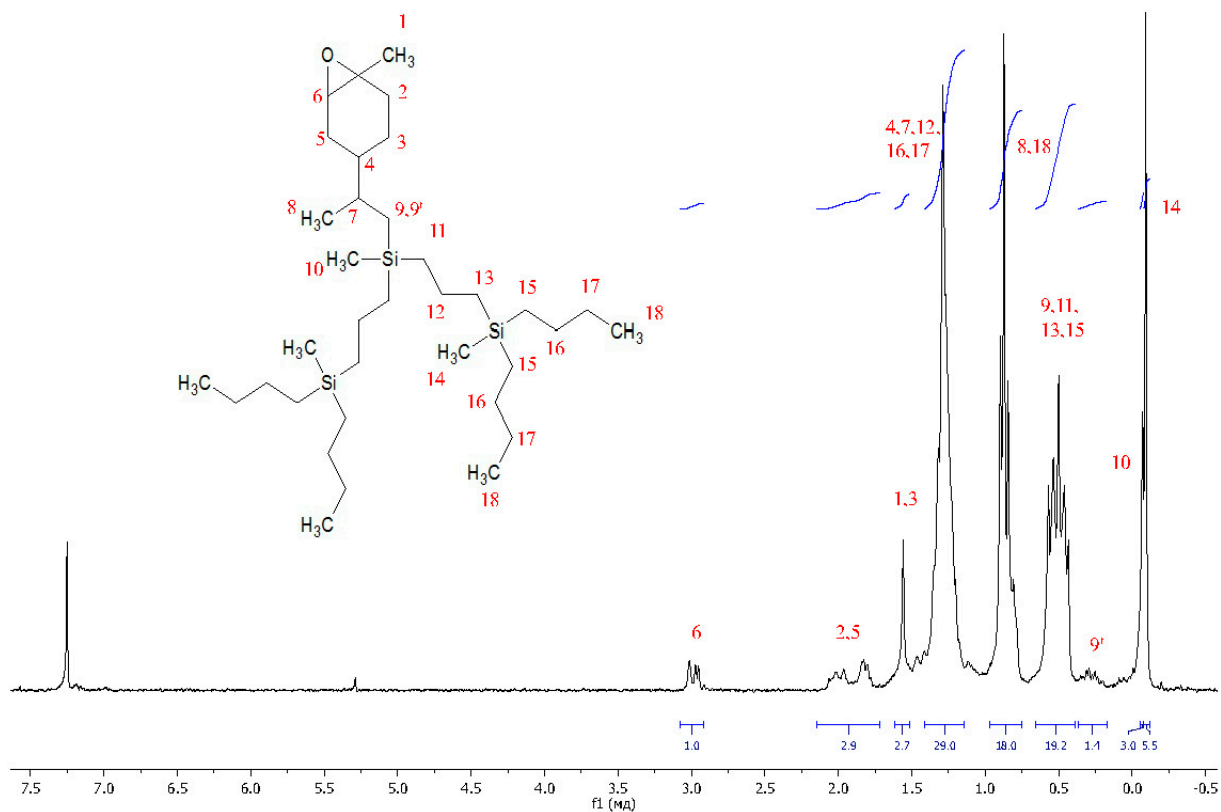Figure S43. <sup>1</sup>H NMR spectrum of *LimOx-G<sub>1</sub>Bu<sup>4</sup>*.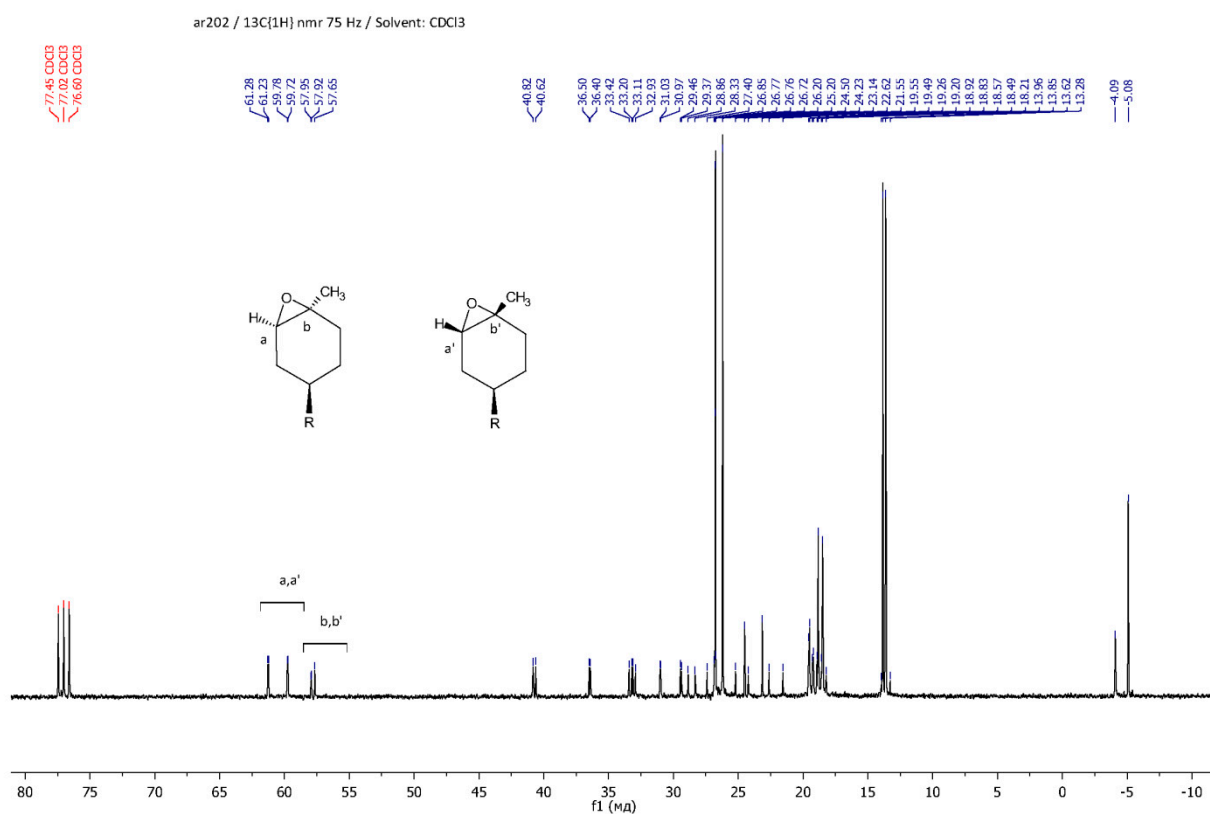Figure S44. <sup>13</sup>C NMR spectrum of *LimOx-G<sub>1</sub>Bu<sup>4</sup>*.

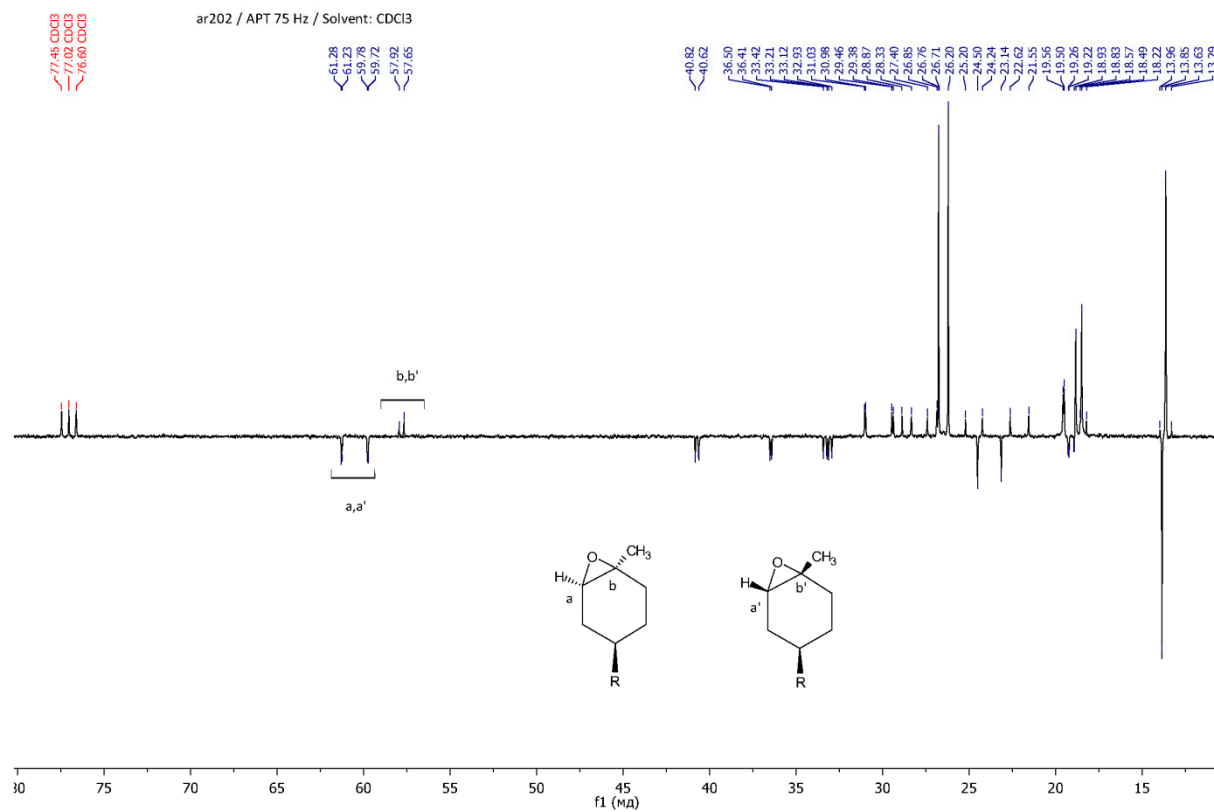

Figure S45. APT NMR spectrum of *LimOx-G<sub>1</sub>Bu<sup>4</sup>*.

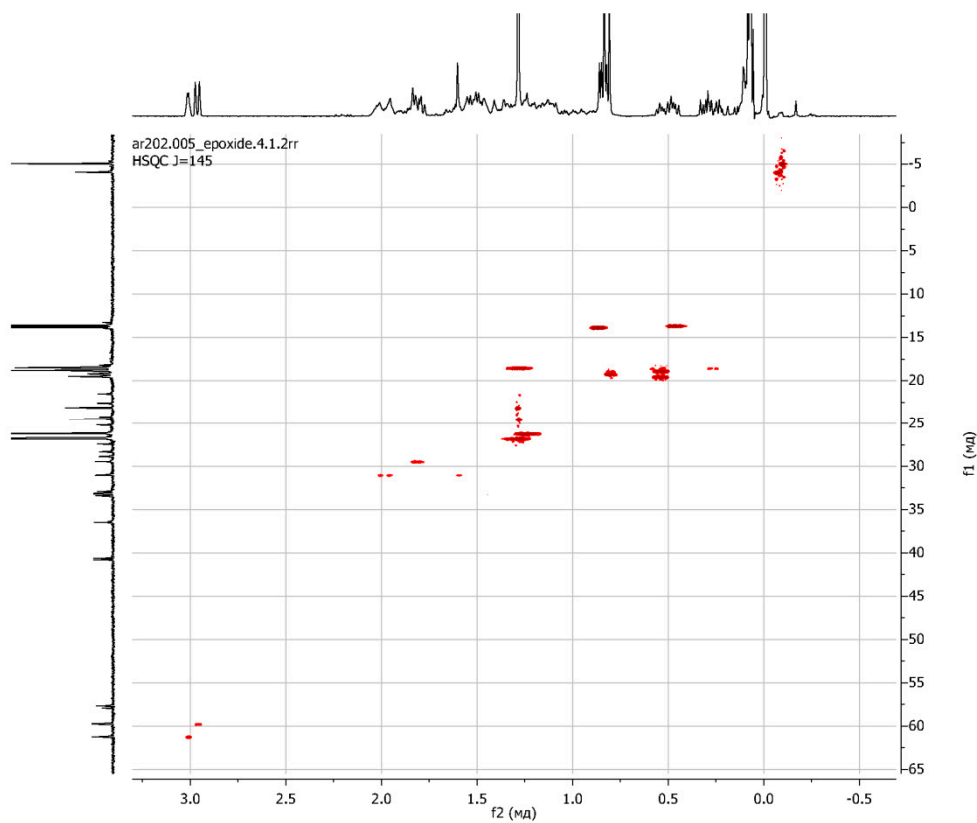

Figure S46.  $\{^1\text{H} \ ^{13}\text{C}\}$  HSQC NMR spectrum of *LimOx-G<sub>1</sub>Bu<sup>4</sup>*.



ar202 / 29Si { 1H } NMR ( 59.6 MHz ) / Solvent : CDCl3

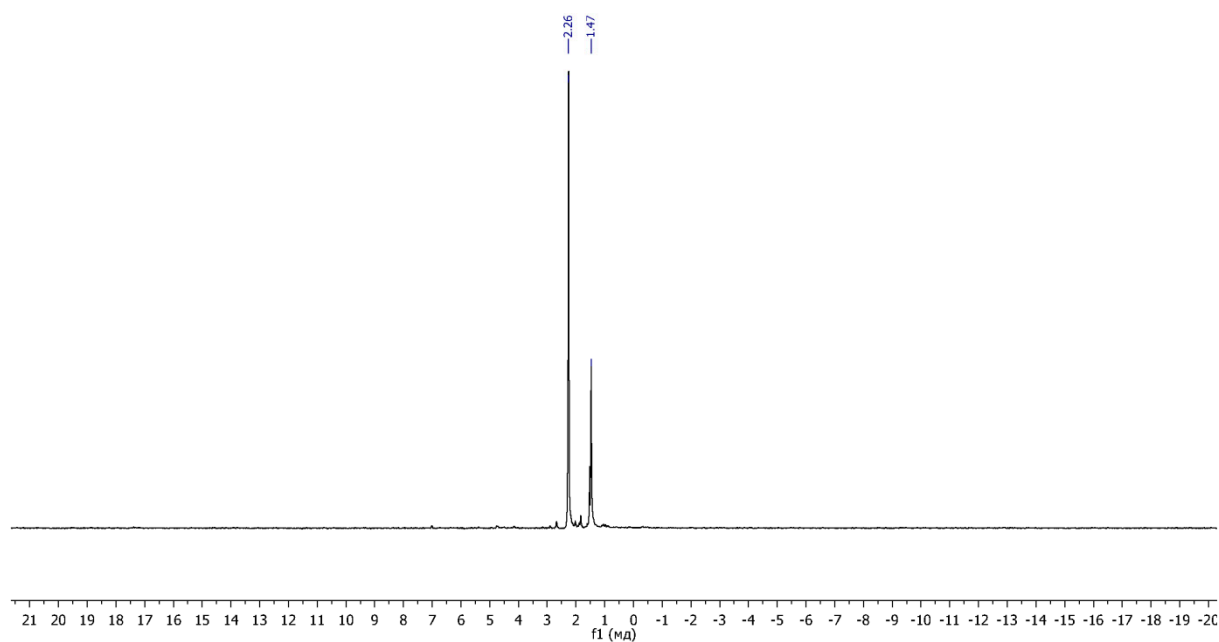

Figure S47.  $^{29}\text{Si}$  NMR spectrum of *LimOx-G1Bu*<sup>4</sup>.

ar203\_epox-azide\_research.1.1.1r  
1H\_

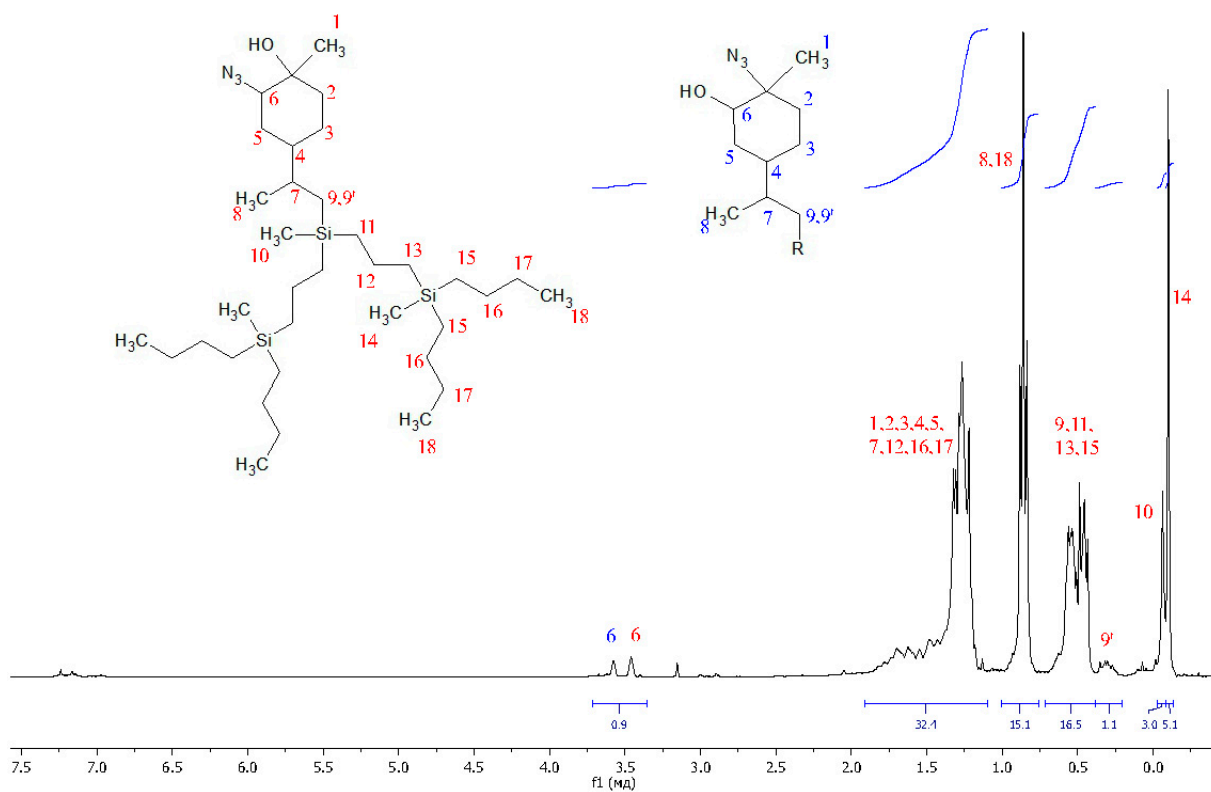

Figure S48.  $^1\text{H}$  NMR spectrum of *LimN3-G1Bu*<sup>4</sup>.

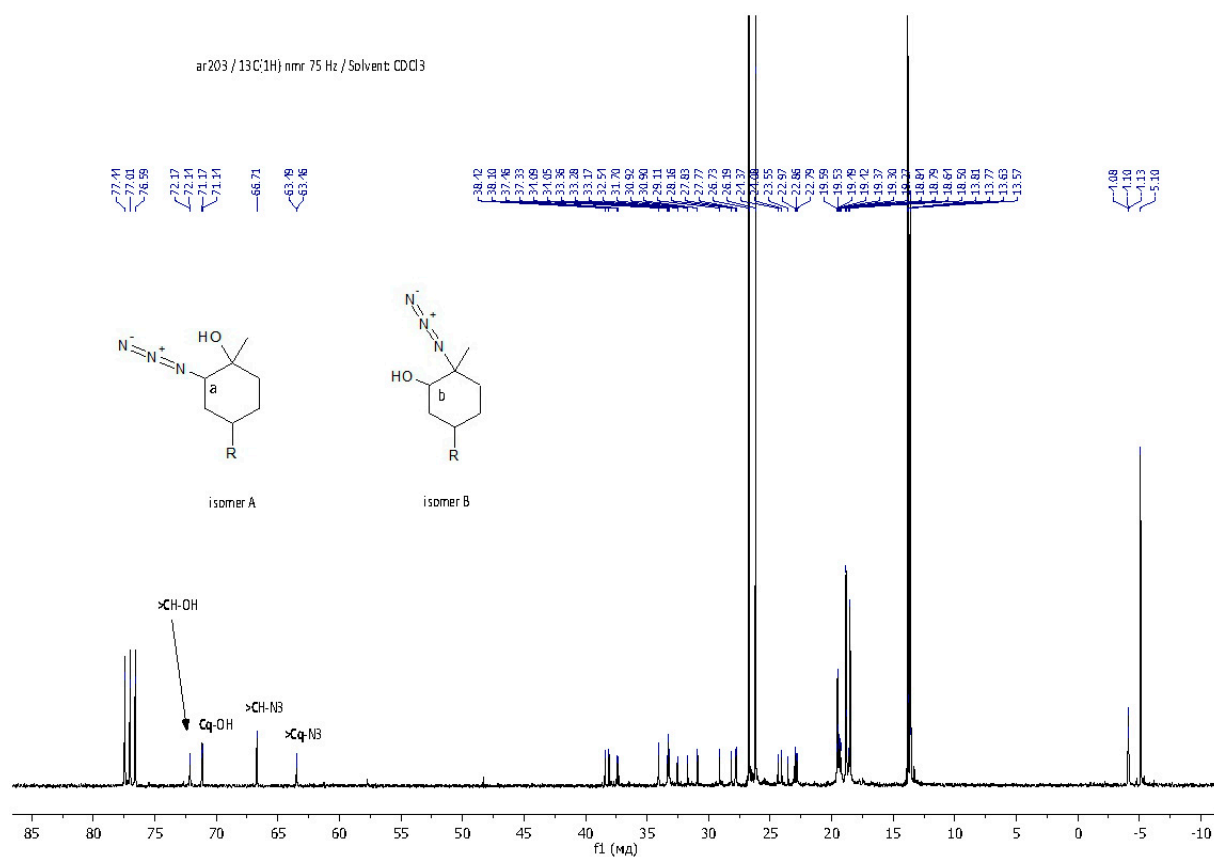

Figure S49.  $^{13}\text{C}$  NMR spectrum of  $\text{LimN}_3\text{-G}_1\text{Bu}^4$ .

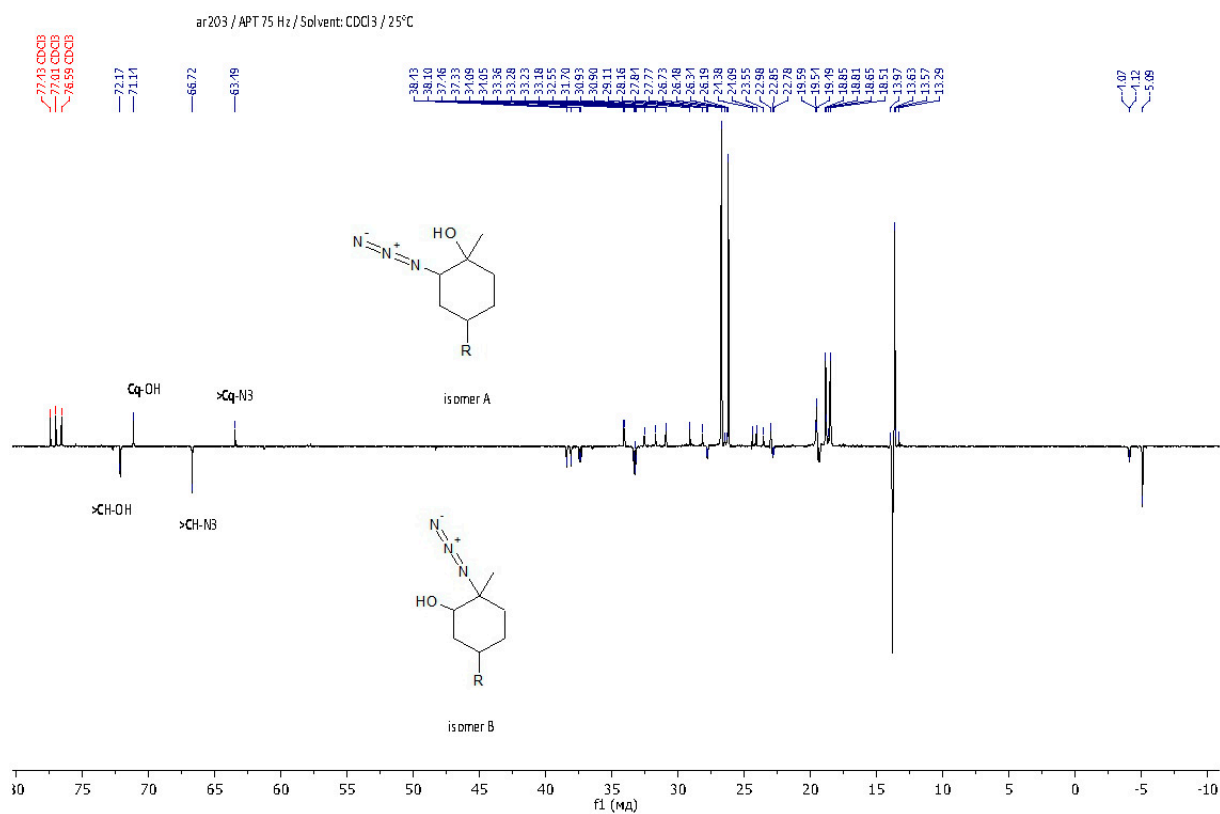

Figure S50. APT NMR spectrum of  $\text{LimN}_3\text{-G}_1\text{Bu}^4$ .

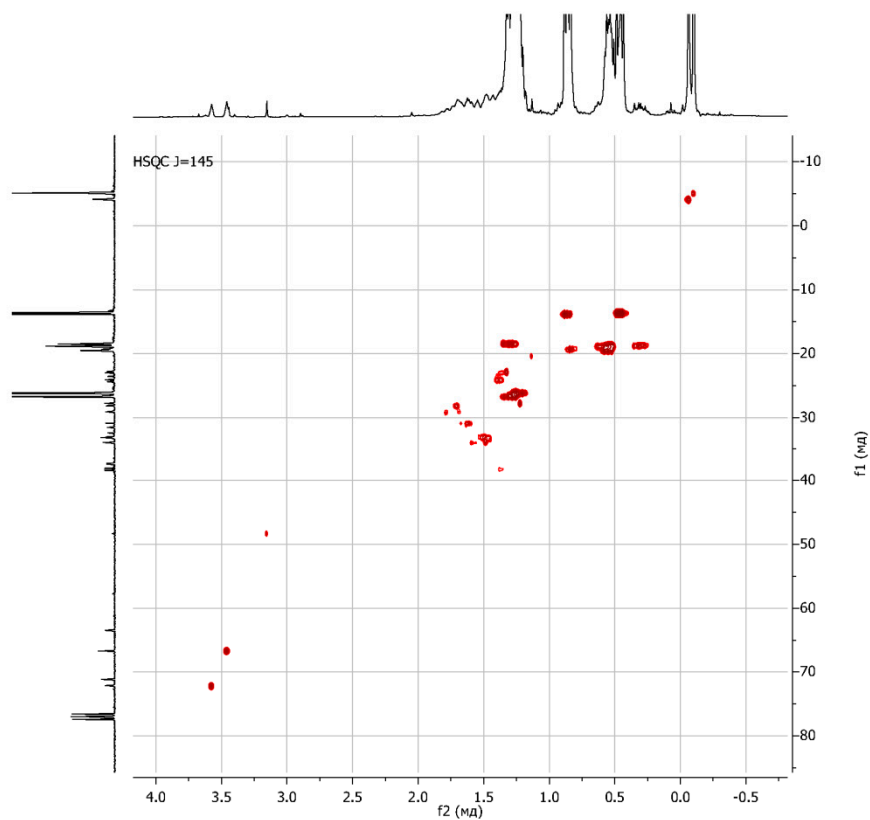

Figure S51.  $\{^1\text{H } ^{13}\text{C}\}$  HSQC NMR spectrum of  $\text{LimN}_3\text{-G}_1\text{Bu}^4$ .

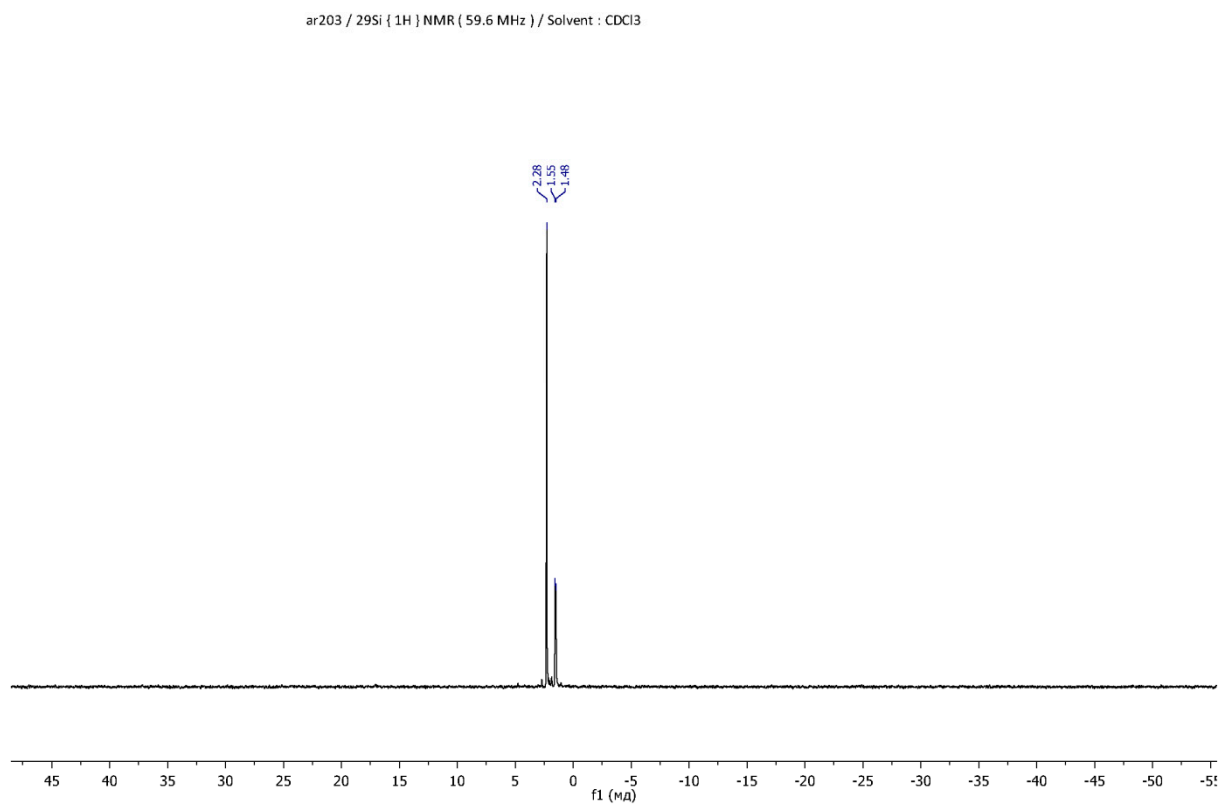

Figure S52.  $^{29}\text{Si}$  NMR spectrum of  $\text{LimN}_3\text{-G}_1\text{Bu}^4$ .

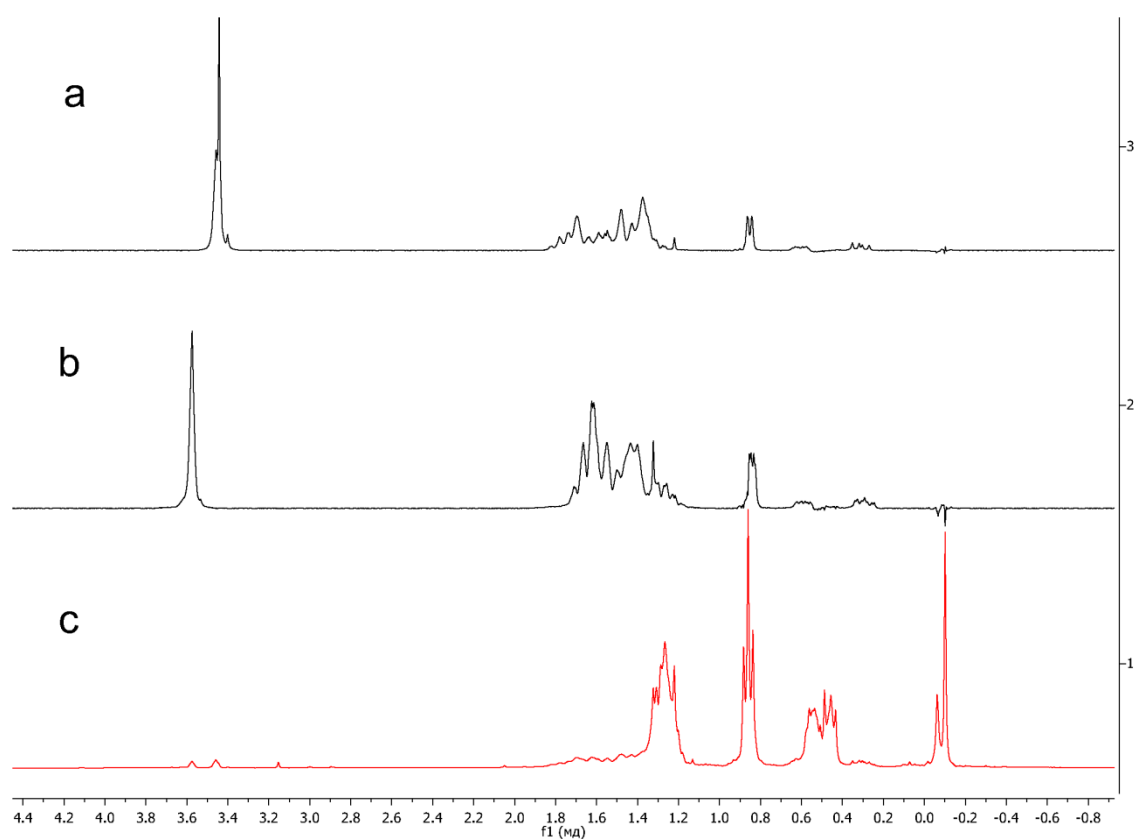

Figure S53. a,b -  $\{^1\text{H}-^1\text{H}\}$  TOCSY NMR spectrum of *LimN<sub>3</sub>-G<sub>1</sub>Bu<sup>4</sup>*; c -  $^1\text{H}$  NMR spectrum of *LimN<sub>3</sub>-G<sub>1</sub>Bu<sup>4</sup>*.

ar203 |  $^{15}\text{N}\{^1\text{H}\}$  NMR (30MHz) | Solvent:  $\text{CDCl}_3$ ,  $\text{Cr}(\text{acac})_3$ , r.t.

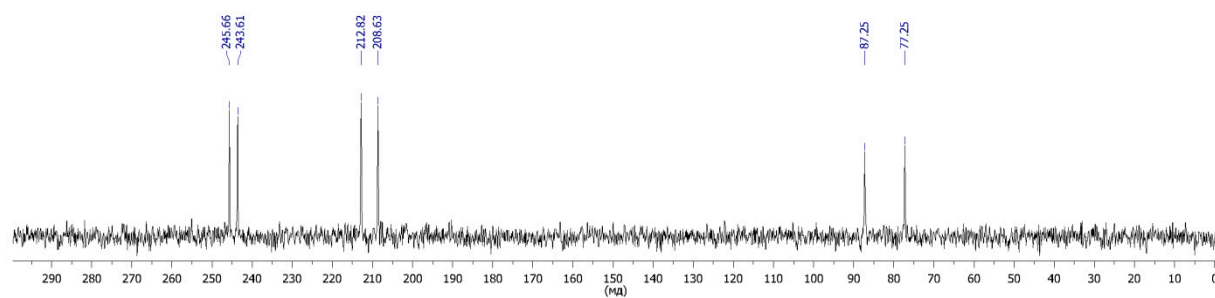

Figure S54.  $^{15}\text{N}$  NMR spectrum of *LimN<sub>3</sub>-G<sub>1</sub>Bu<sup>4</sup>*.

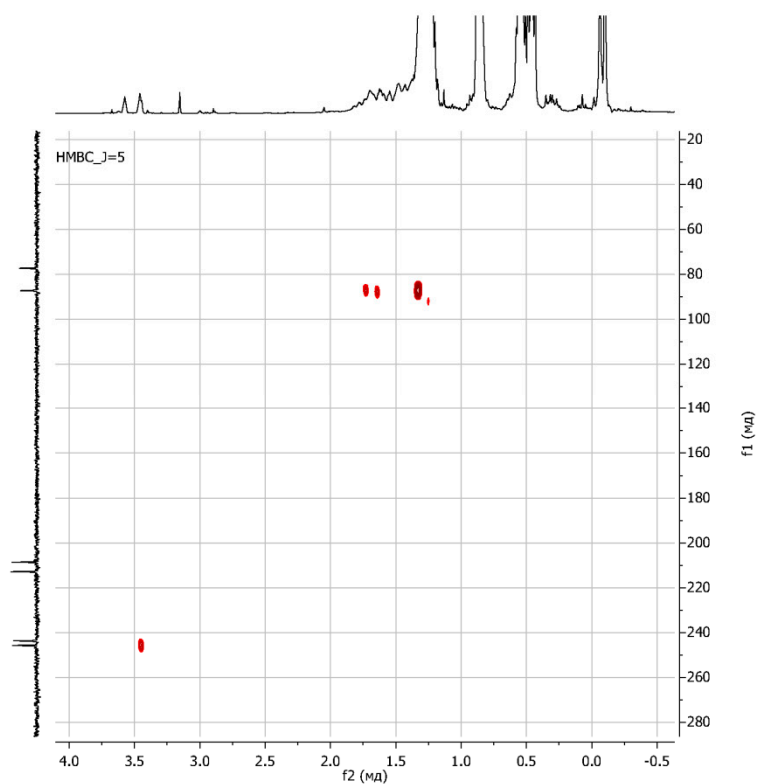

Figure S55.  $\{^1\text{H } ^{15}\text{N}\}$  HMBC NMR spectrum of *LimN<sub>3</sub>-G<sub>1</sub>Bu<sup>4</sup>*.

ar296\_epox-LAG.1.1.1r  
1H\_

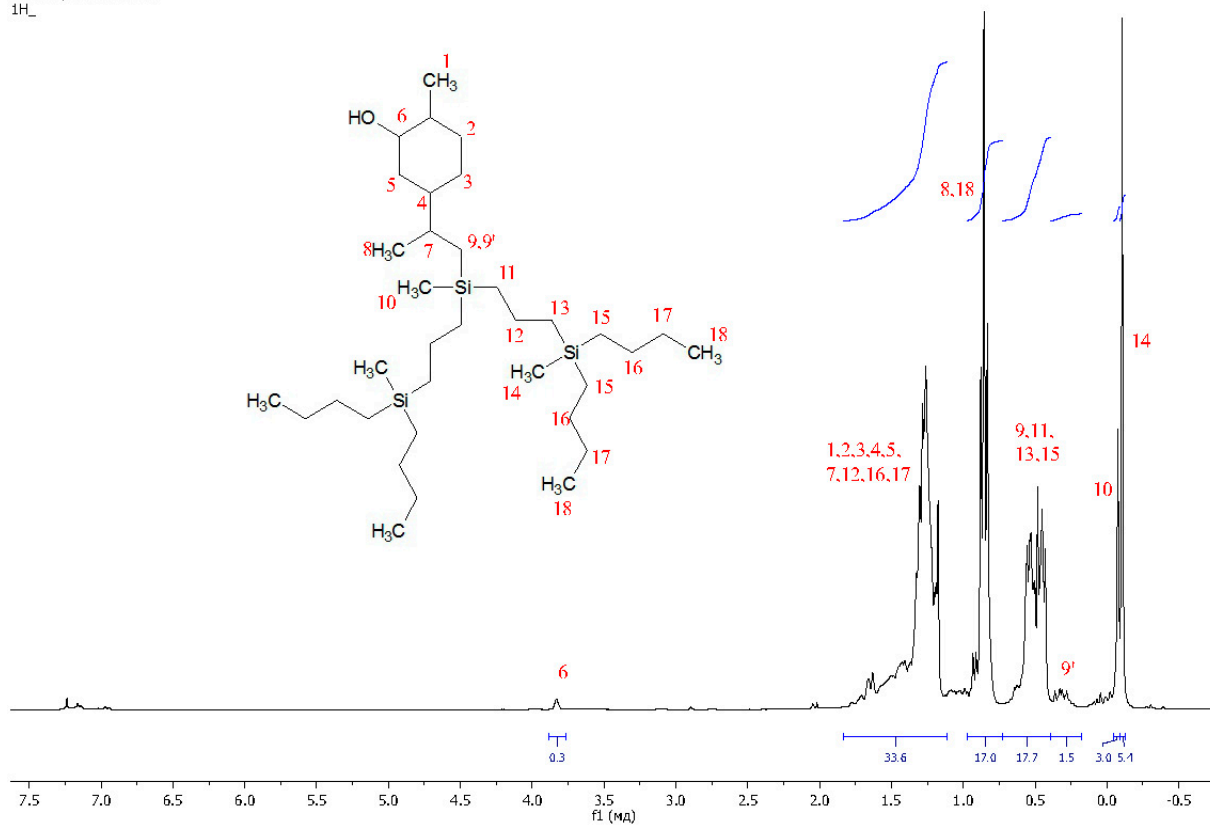

Figure S56.  $^1\text{H}$  NMR spectrum of *LimOH-G<sub>1</sub>Bu<sup>4</sup>*.

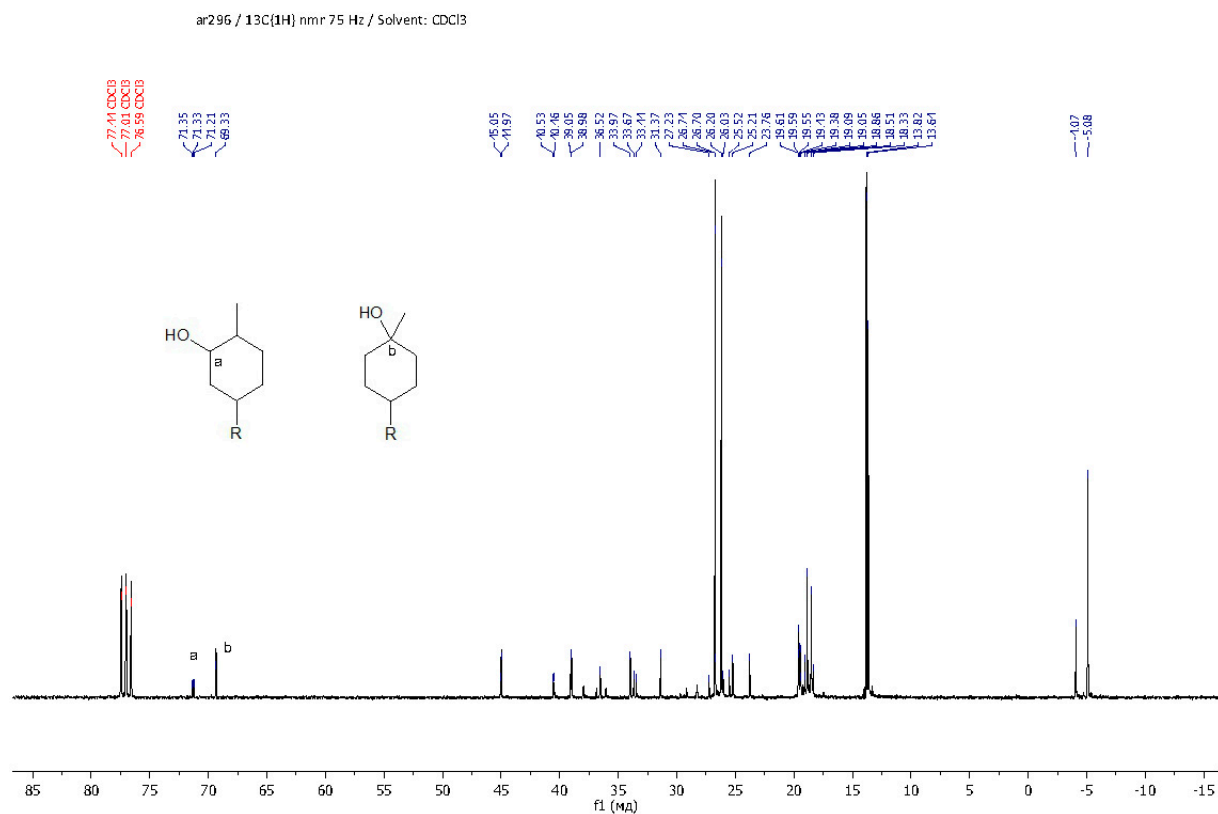

Figure S57.  $^{13}\text{C}$  NMR spectrum of *LimOH-G<sub>1</sub>Bu<sup>4</sup>*.

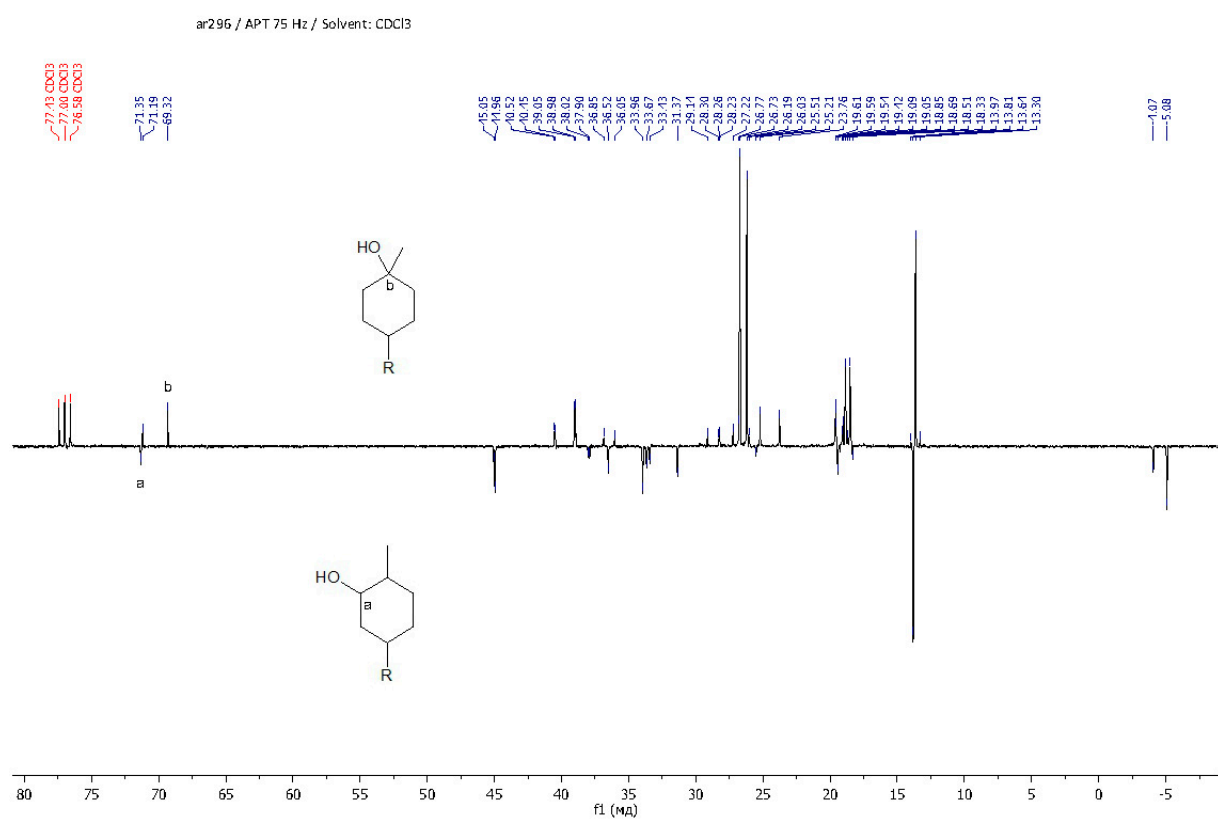

Figure S58. APT NMR spectrum of *LimOH-G<sub>1</sub>Bu<sup>4</sup>*.

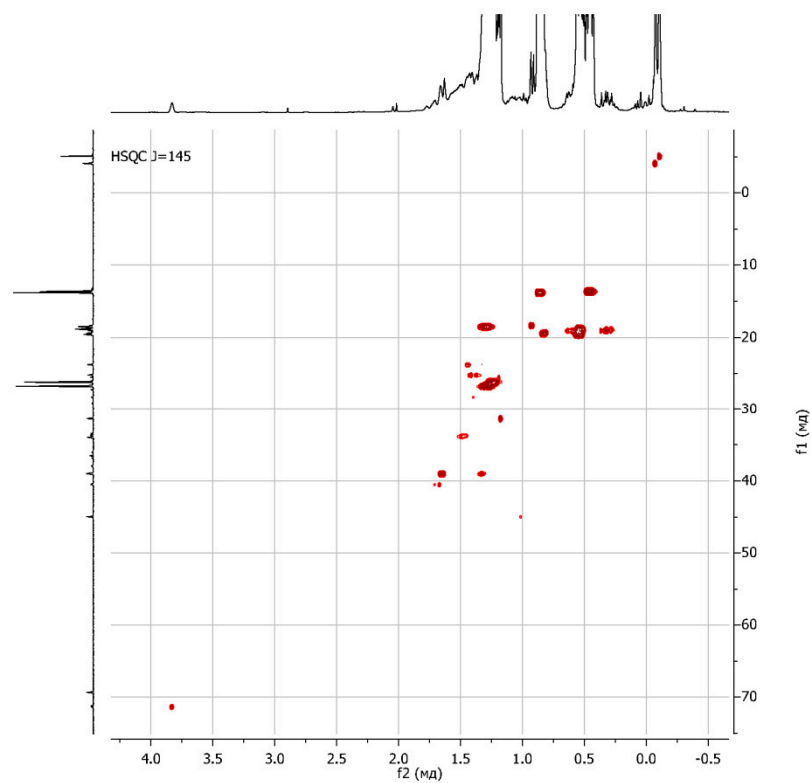

Figure S59.  $\{^1\text{H } ^{13}\text{C}\}$  HSQC NMR spectrum of *LimOH-G<sub>1</sub>Bu<sup>4</sup>*.

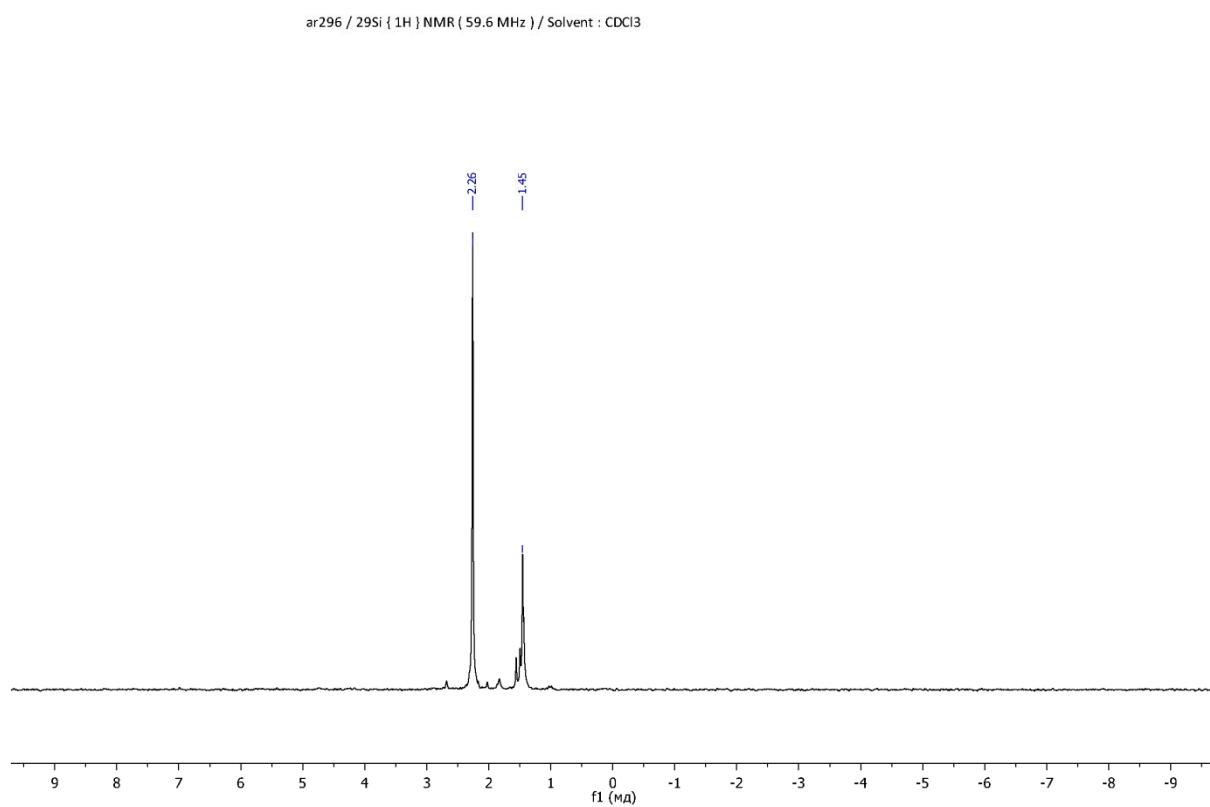

Figure S60.  $^{29}\text{Si}$  NMR spectrum of *LimOH-G<sub>1</sub>Bu<sup>4</sup>*.

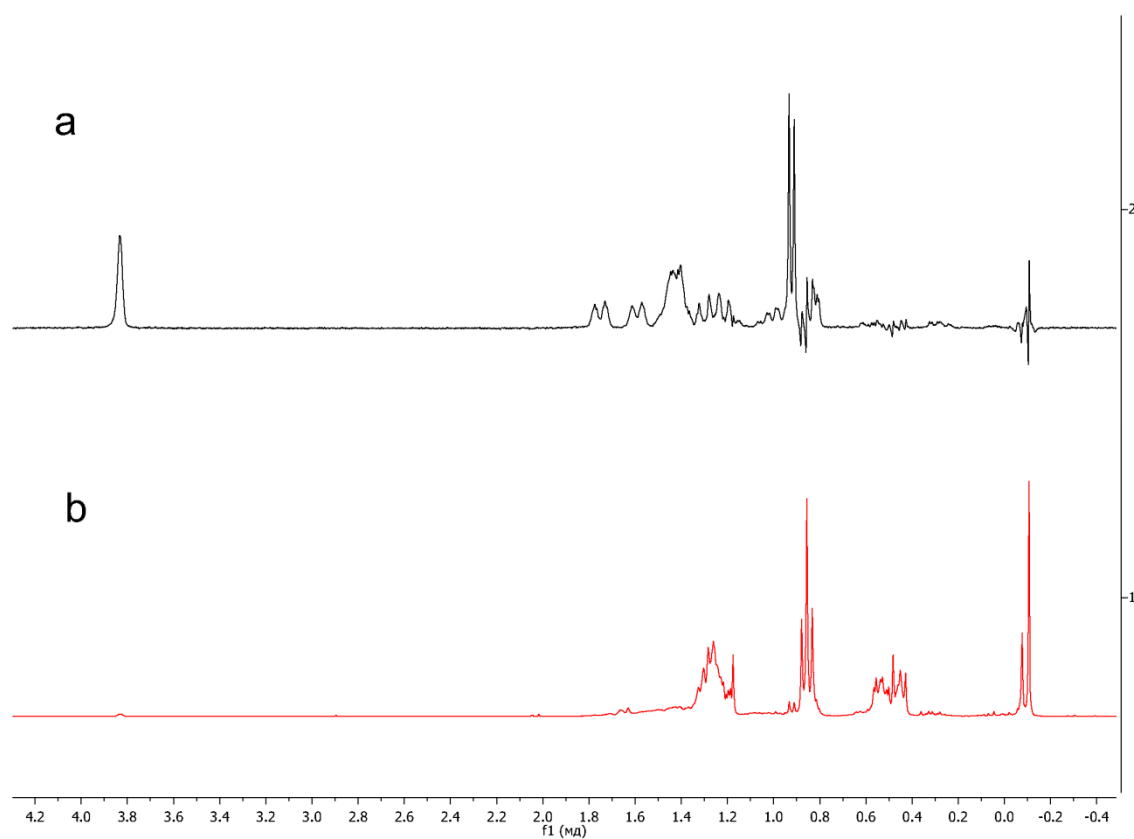

Figure S61. a -  $\{^1\text{H}-^1\text{H}\}$  TOCSY NMR spectrum of *LimOH-G<sub>1</sub>Bu<sup>4</sup>*; b -  $^1\text{H}$  NMR spectrum of *LimOH-G<sub>1</sub>Bu<sup>4</sup>*.

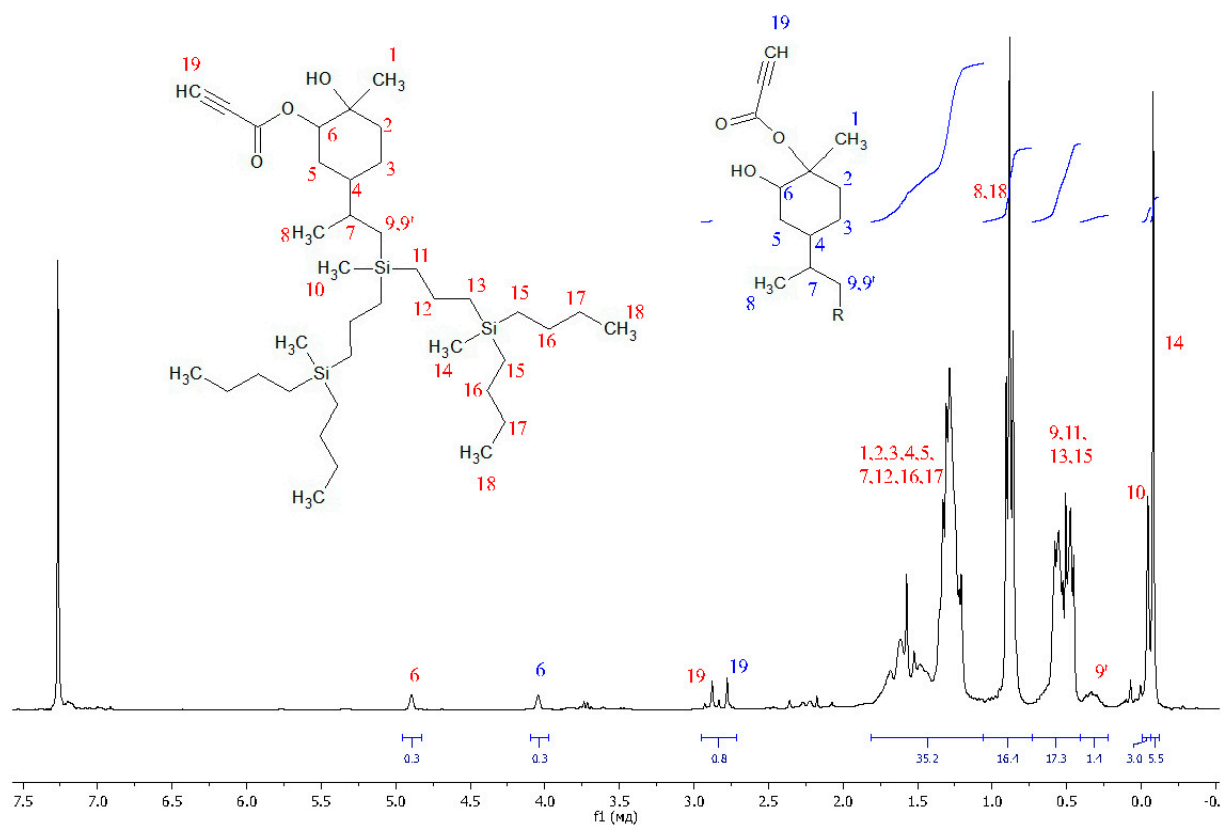

Figure S62.  $^1\text{H}$  NMR spectrum of *LimC $\equiv$ C-G<sub>1</sub>Bu<sup>4</sup>*.



ar298 /  $^{13}\text{C}\{^1\text{H}\}$  nmr 75 Hz / Solvent:  $\text{CDCl}_3$

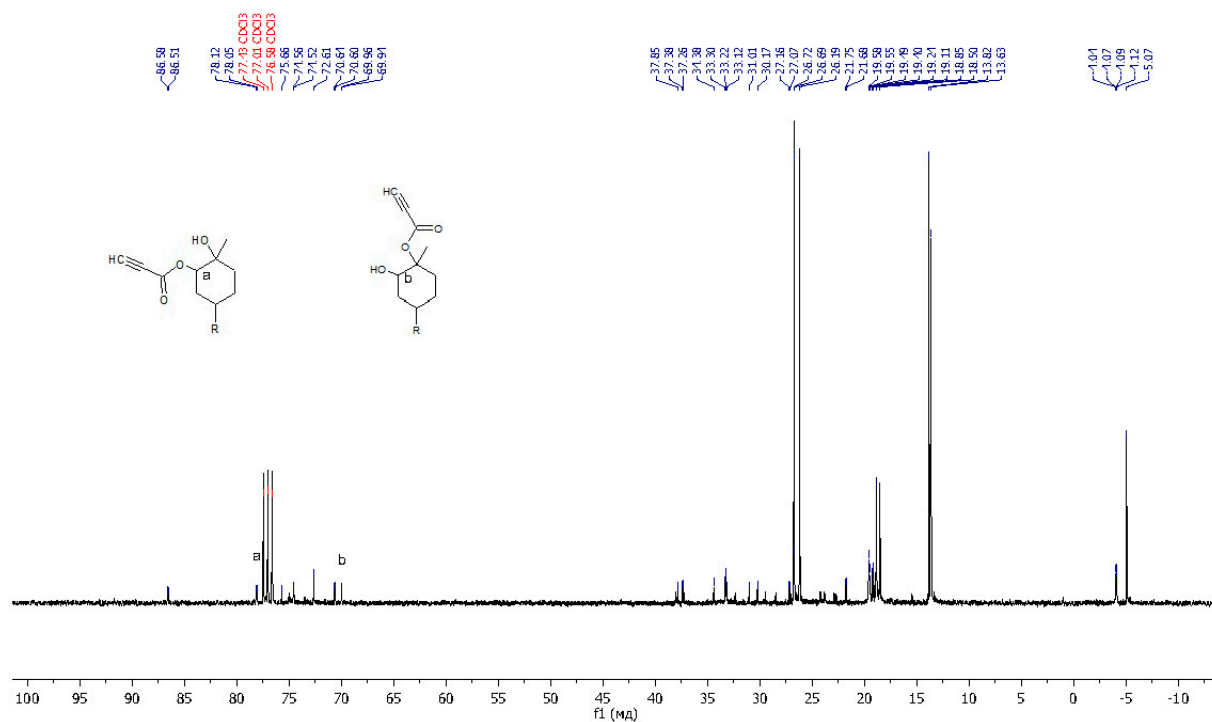

Figure S63.  $^{13}\text{C}$  NMR spectrum of  $\text{LimC}\equiv\text{C-G}_1\text{Bu}^4$ .

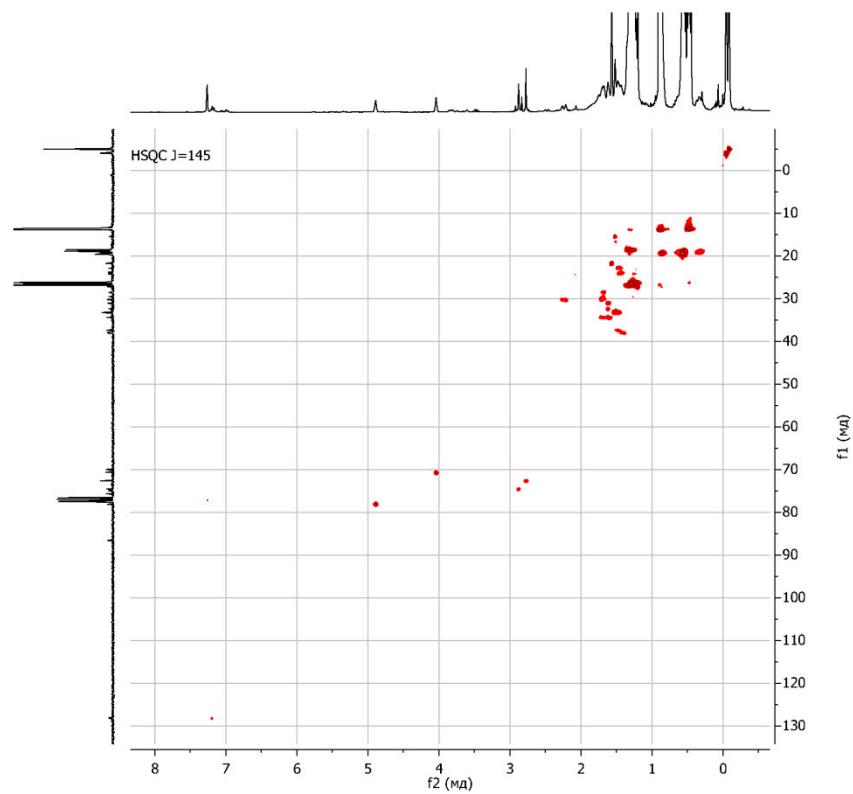

Figure S64.  $\{^1\text{H} \ ^{13}\text{C}\}$  HSQC NMR spectrum of  $\text{LimC}\equiv\text{C-G}_1\text{Bu}^4$ .

## SI2. GPC curves

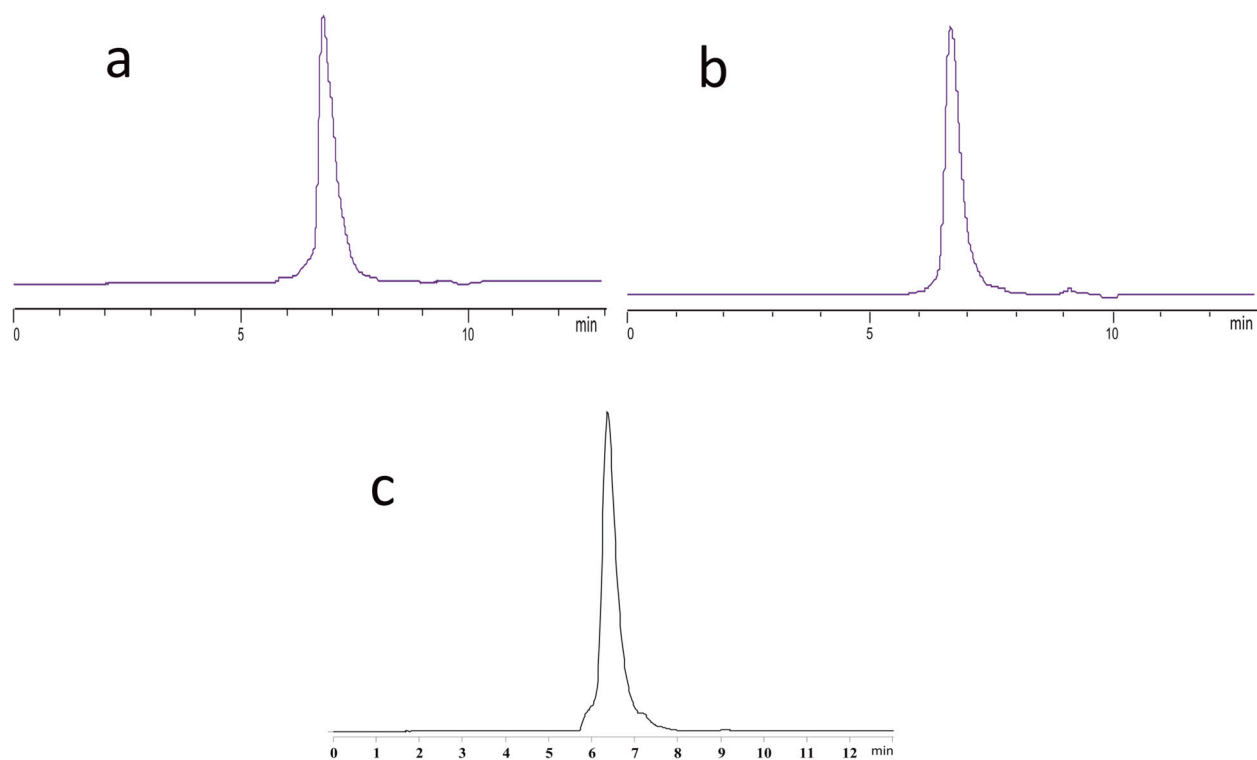

Figure S65. GPC chromatograms of dendrons based on limonene with azide functionality on the periphery («a» -  $\text{Lim-G}_0(\text{PrN}_3)^2$ , «b» -  $\text{Lim-G}_1(\text{PrN}_3)^3$ , «c» -  $\text{Lim-G}_2(\text{PrN}_3)^4$ ).

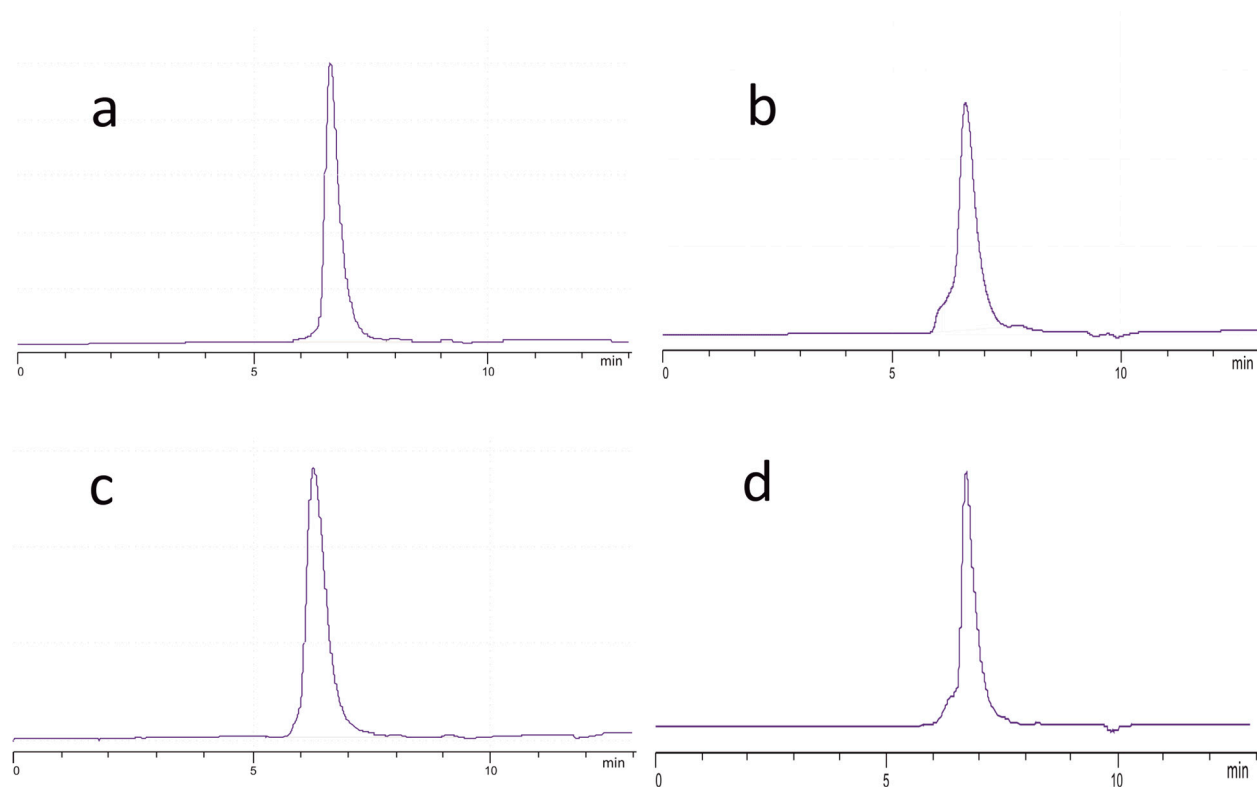

Figure S66. GPC chromatograms of dendrons based on limonene with epoxy functionality at the focal point («a» -  $\text{LimOx-G}_{1,5}\text{TMS}^4$ , «b» -  $\text{LimOx-G}_{1,5}\text{TMS}^6$ , «c» -  $\text{LimOx-G}_{2,5}\text{TMS}^8$ , «d» -  $\text{LimOx-G}_1\text{Bu}^4$ ).

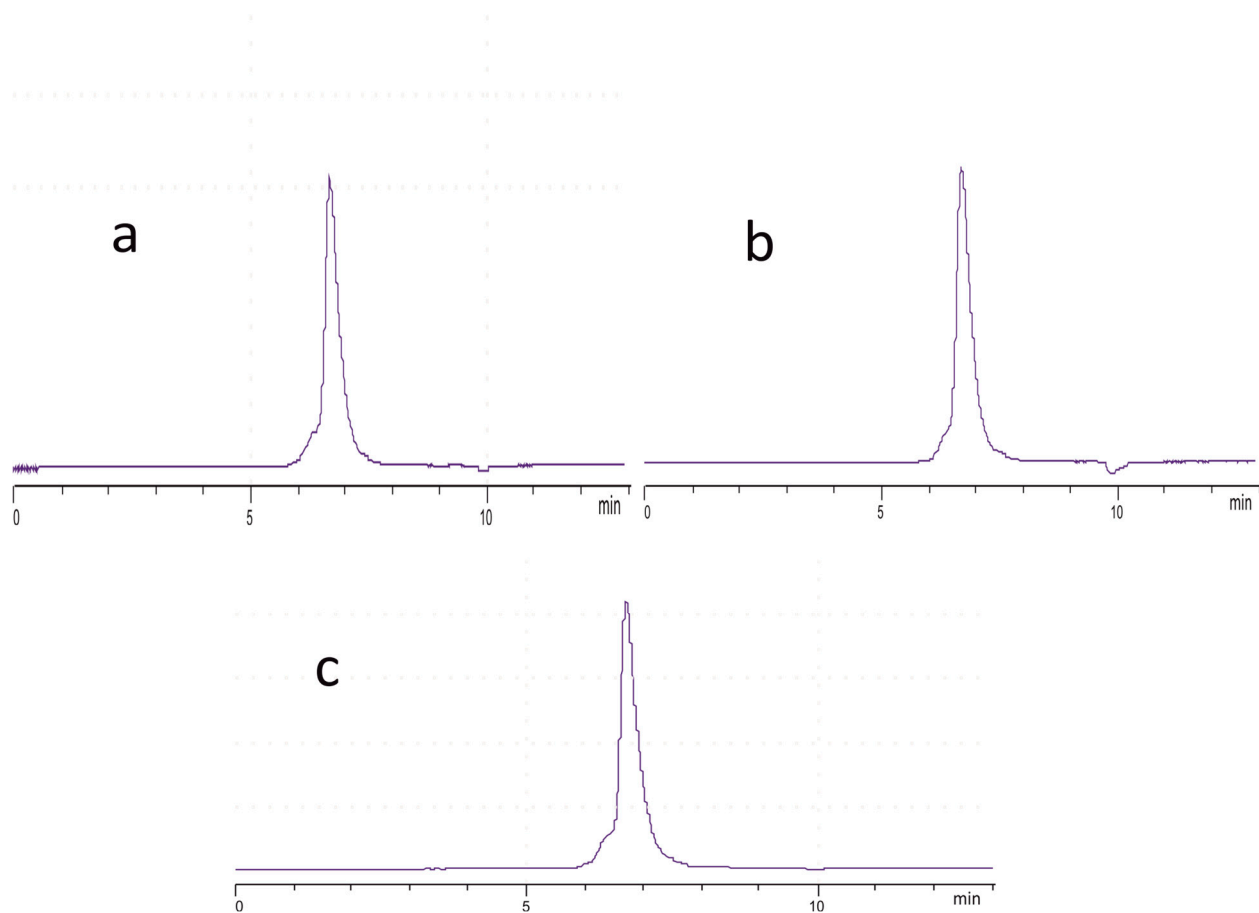

Figure S67. GPC chromatograms of carbosilane dendrons based on limonene with different functionality at the focal point («a» -  $\text{LimOH-G}_1\text{Bu}^4$ , «b» -  $\text{LimN}_3\text{-G}_1\text{Bu}^4$ , «c» -  $\text{LimC}\equiv\text{C-G}_1\text{Bu}^4$ ).

### SI3. GC curves

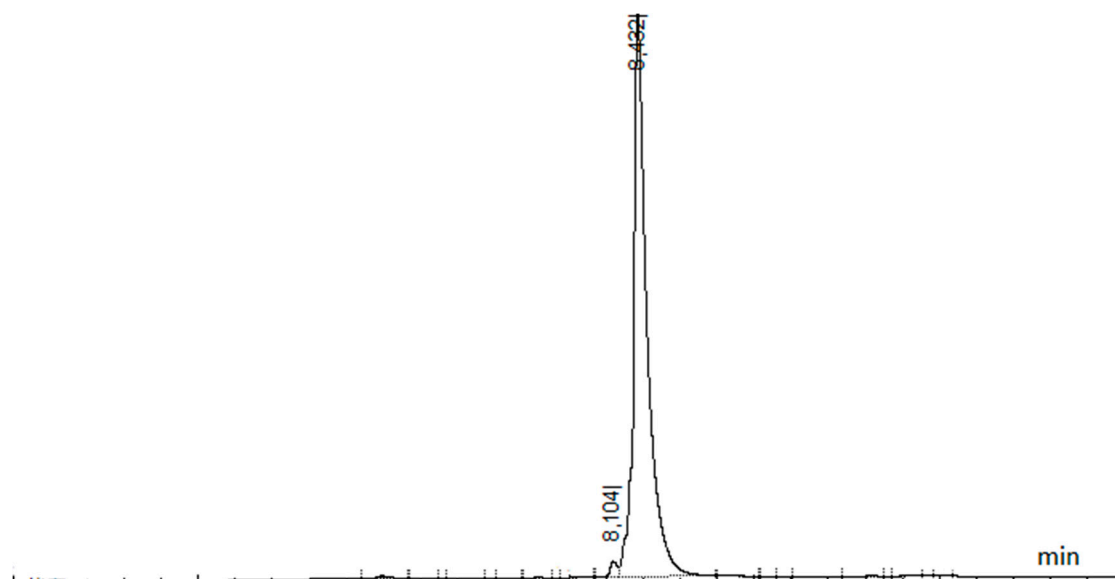

Figure S68. GC chromatogram of  $\text{LimOx-G}_{0.5}\text{TMS}^2$ .
